# Supplementary material for: A catalog of validity indices for step counting wearable technologies during treadmill walking: the CADENCE-adults study
Source: PubMed Central journal article supplement (PMC9461139; doi:10.1186/s12966-022-01350-9), 2022-09-08
Supplement: 12966_2022_1350_MOESM1_ESM.pdf [file 12966_2022_1350_MOESM1_ESM.pdf]

**Additional file 1: Suppl Table 1** Step counting treadmill validation studies among wearable technologies in adults and older adults

| Reference<br>(first<br>author) | Sample                                | Protocol<br>(duration;<br>speeds)                    | Wearable Technologies<br>(location)                                                                                                                                                                                                                       | Accuracy                                                                                                                                                                                  | Bias                                                         | Precision                                                                        |
|--------------------------------|---------------------------------------|------------------------------------------------------|-----------------------------------------------------------------------------------------------------------------------------------------------------------------------------------------------------------------------------------------------------------|-------------------------------------------------------------------------------------------------------------------------------------------------------------------------------------------|--------------------------------------------------------------|----------------------------------------------------------------------------------|
| Adamakis <sup>1</sup><br>2021  | 30<br>25.9 ± 5.7<br>19-43<br>63%      | 5-min;<br>128.7, 160.9<br>m/min                      | Accupedo iOS: ACiwa (waist)<br>Pacer iOS: Piwa (waist)<br>Runtastic iOS: Riwa (waist)<br>Argus iOS: ARiwa (waist)<br>Accupedo Android: ACAwa<br>(waist)<br>Pacer Android: PAwa (waist)<br>Runtastic Android: RAwa (waist)<br>Argus Android: ARAwa (waist) | MAPE:<br>ACiwa: 2.05%, 1.37%<br>Piwa: 2.05%, 1.37%<br>Riwa: 2.62%, 1.37%<br>ARiwa: 3.20%, 2.75%<br>ACAwa: 1.51%, 0.82%<br>PAwa: 1.56%, 0.82%<br>RAwa: 2.85%, 0.82%<br>ARAwA: 1.51%, 0.82% | Bland – Altman plots                                         | Not reported                                                                     |
| Ali <sup>2</sup><br>2018       | 20<br>26 ± 3<br>18-65<br>85%          | 5-min;<br>53.4, 67.2,<br>79.8 m/min                  | 3 Fitbit Flex: FFwr (wrist)                                                                                                                                                                                                                               | Not reported                                                                                                                                                                              | MPE: -12%, -9%, -7%                                          | ICC: 0.82, 0.78, 0.69                                                            |
| Alinia <sup>3</sup><br>2017    | 15<br>21-31<br>47%                    | 5-min;<br>41.7, 83.3,<br>133.3<br>m/min              | Fitbit Zip: FZp (pant pocket)<br>Fitbit One: FOc (chest)<br>Fitbit Flex: FFwr (wrist)                                                                                                                                                                     | MAPE:<br>FZp: 5.5%, 3.7%, 5.5%<br>FOc: 6.7%, 1.4%, 1.8%<br>FFwr: 6.8%, 3.9%, 4.4%                                                                                                         | Not reported                                                 | ICC:<br>FZp: 0.91, 0.83, 0.71<br>FOc: 0.70, 1.37, 0.68<br>FFwr: 0.76, 1.07, 1.07 |
| Clemes <sup>4</sup><br>2010    | 68<br>19.2 ± 2.7<br>% not<br>reported | 3-min;<br>53.6, 67,<br>80.5, 93.9,<br>107.3<br>m/min | Silva: SLhr (hip; right)<br>Silva: SLhl (hip; left)<br>NL-1000: NLh (hip)                                                                                                                                                                                 | Not reported                                                                                                                                                                              | MPE:<br>SLhr: 30.5-9.3%<br>SLhl: 46.9-6.7%<br>NLh: 12.9-0.9% | Not reported                                                                     |

|                               |                                    |                                                                                     |                                                                                                                                                                                                                                                             |                                                                                                                                                                                |                                                                                                                       |                                                                                                                                                                             |
|-------------------------------|------------------------------------|-------------------------------------------------------------------------------------|-------------------------------------------------------------------------------------------------------------------------------------------------------------------------------------------------------------------------------------------------------------|--------------------------------------------------------------------------------------------------------------------------------------------------------------------------------|-----------------------------------------------------------------------------------------------------------------------|-----------------------------------------------------------------------------------------------------------------------------------------------------------------------------|
| DeCocker <sup>5</sup><br>2012 | 40<br>29.5 ± 7.7<br>50%            | 5-min;<br>53.3, 66.7,<br>80, 93.3,<br>106.7<br>m/min                                | Omron HJ-203: OMp (pant pocket)<br>Omron HJ-203: OMb (carrier bag)<br>Omron HJ-203: OMn (neck)                                                                                                                                                              | MAPE:<br>OMP: 80%, 75%, 57.5%,<br>27.5%, 32.5%<br>OMc: 47.5%, 22.5%, 10%,<br>10%, 7.5%<br>OMn: 20%, 0%, 0%, 0%,<br>2.5%                                                        | MPE:<br>OMP: -15 – 65%<br>OMb: -5 – 20%<br>OMn: -2.5 – 17.5%                                                          | ICC: 0.25, 0.27, 0.53, 0.73,<br>0.96                                                                                                                                        |
| Ducharme <sup>6</sup><br>2021 | 75<br>29.57 ± 5.56<br>21-39<br>51% | 5-min;<br>13.4, 26.8,<br>40.2, 53.6,<br>67, 80.5,<br>93.9, 107.3,<br>120.7<br>m/min | GENEActiv: GAwr (wrist)<br>GENEActiv: GAwa (waist)<br>ActiGraph GT9X: AGwr (wrist)<br>ActiGraph GT9X: AGwa (waist)                                                                                                                                          | Not reported                                                                                                                                                                   | Mean step error:<br>GAwr: -112.90 to 53.30<br>GAwa: -10.43 to -0.04<br>AGwr: -127.55 to 89.85<br>AGwa: -1.32 to 24.24 | SD (±):<br>GAwr: 33.35 to 102.30<br>GAwa: 3.34 to 83.71<br>AGwr: 32.05 to 107.35<br>AGwa: 2.29 to 52.29                                                                     |
| Feng <sup>7</sup><br>2017     | 25<br>25.96 ± 7.86<br>18-53<br>44% | 4-min;<br>54, 66, 78<br>m/min                                                       | APDM Opal: OPwa (waist)<br>Actigraph wGT3X-BT: AGwa<br>(waist)<br>Axivity AX3: AXwa (waist)                                                                                                                                                                 | Not reported                                                                                                                                                                   | MPE:<br>OPwa: 0.292%<br>AGwa: -0.271%<br>AXwa: -0.089%                                                                | 95% CI:<br>OPwa: (0.401-0.183)<br>AGwa: (-0.372 to -0.170)<br>AXwa: (-0.166 to -0.012)                                                                                      |
| Fokkema <sup>8</sup><br>2017  | 31<br>32 ± 12<br>48%               | 10-min;<br>53.3, 80,<br>106.7<br>m/min                                              | Polar Loop: PLwr (wrist)<br>Garmin Vivosmart: GVwr (wrist)<br>Fitbit Charge HR: FBwr (wrist)<br>Apple Watch Sport: AWwr (wrist)<br>Pebble Smartwatch: PSwr (wrist)<br>Samsung Gear S: SGwr (wrist)<br>Misfit Flash: MFh (hip)<br>Jawbone Up Move: JBh (hip) | Test 1<br>MAPE:<br>PLwr: 26.4%, 3.0%, 3.6%<br>GVwr: 1.0%, -0.2%, 9.0%<br>FBwr: -0.7%, 2.0%, 5.2%<br>AWwr: 1.9%, 0.0%, 0.5%<br>PSwr: 6.0%, 2.9%, 1.3%<br>SGwr: 5.6%, 4.0%, 1.1% | Bland-Altman plots                                                                                                    | Test 1<br>ICC:<br>PLwr: 0.08, 0.26, 0.24<br>GVwr: 0.95, 0.57, 0.10<br>FBwr: 0.62, 0.20, 0.31<br>AWwr: 0.57, 0.93, 0.91<br>PSwr: 0.28, 0.34, 0.86,<br>SGwr: 0.04, 0.02, 0.85 |

|                             |                                                              |                                    |                                                                                                                                                                                                                       |                                                                                                                                                                                                                                                                                           |                                                                                                                                                       |                                                                                                                                                                                                                                                                 |
|-----------------------------|--------------------------------------------------------------|------------------------------------|-----------------------------------------------------------------------------------------------------------------------------------------------------------------------------------------------------------------------|-------------------------------------------------------------------------------------------------------------------------------------------------------------------------------------------------------------------------------------------------------------------------------------------|-------------------------------------------------------------------------------------------------------------------------------------------------------|-----------------------------------------------------------------------------------------------------------------------------------------------------------------------------------------------------------------------------------------------------------------|
|                             |                                                              |                                    | Flyfit: FFa (ankle)<br>Moves: MVp (pant pocket)                                                                                                                                                                       | MFh: 15.2%, 5.4%, 6.0%<br>JBh: 8.7%, 5.9%, 1.2%<br>FFa: 16.1%, 5.3%, 2.3%<br>MVp: 14.0%, -2.6%, 0.3%                                                                                                                                                                                      |                                                                                                                                                       | MFh: 0.06, 0.26, 0.11<br>JBh: 0.12, 0.09, 0.71<br>FFa: 0.18, 0.31, 0.27<br>MVp: 0.15, 0, 0.25                                                                                                                                                                   |
|                             |                                                              |                                    |                                                                                                                                                                                                                       | Test 2<br>MAPE:<br>PLwr: 26.3%, 10.7%, 3.0%<br>GVwr: 0.9%, 0.3%, 11.9%<br>FBwr: -0.9%, 1.7%, 7.7%<br>AWwr: 1.4%, 2.6%, 0.1%<br>PSwr: 3.0%, 1.4%, 1.0%<br>SGwr: 4.8%, 3.5%, 0.8%<br>MFh: 18.1%, 8.5%, 7.5%<br>JBh: 11.7%, 2.6%, 1.6%<br>FFa: 19.5%, 7.0%, 6.8%<br>MVp: 12.6%, -0.8%, -0.2% |                                                                                                                                                       | Test 2<br>ICC:<br>PLwr: 0.09, 0, 0.42<br>GVwr: 0.95, 0.95, 0<br>FBwr: 0.74, 0.27, 0.15<br>AWwr: 0.73, 0.52, 0.86<br>PSwr: 0.78, 0.77, 0.91<br>SGwr: 0, 0.17, 0.92<br>MFh: 0.15, 0.07, 0.08<br>JBh: 0.17, 0.56, 0.72<br>FFa: 0.17, 0.32, 0.08<br>MVp: 0, 0, 0.37 |
| Foster <sup>9</sup><br>2005 | 10 (lean)<br>10 (obese)<br>30 ± 13<br>32 ± 7<br>21-51<br>50% | 15-min;<br>16.7, 33.3,<br>50 m/min | Omron HF-100: OMkl (knee; lean)<br>Omron HF-100: OMko (knee;<br>obese)<br>Digi-Walker 2: DWkl (knee; lean)<br>Digi-Walker 2: DWko (knee;<br>obese)<br>Stepwatch: SWal (ankle; lean)<br>Stepwatch: SWao (ankle; obese) | Not reported                                                                                                                                                                                                                                                                              | MPE:<br>OMkl: 56%, 98%, 99%<br>OMko: 66%, 94%, 97%<br>DWkl: 36%, 89%, 100%<br>DWko: 17%, 76%, 100%<br>SWal: 99%, 100%, 100%<br>SWao: 100%, 100%, 100% | SD:<br>OMkl: 14, 2.9, 2.1<br>OMko: 10, 3.5, 2.2<br>DWkl: 11, 4.7, 2.6<br>DWko: 7, 7.3, 2.7<br>SWal: 0.56, 0.34, 0.30<br>SWao: 0.35, 0.26, 0.37                                                                                                                  |
| Grant <sup>10</sup><br>2008 | 21<br>65-87                                                  | 5-min;                             | ActivPAL: APt (thigh)                                                                                                                                                                                                 | MAPE:<br>only visualized in graph                                                                                                                                                                                                                                                         | Bland-Altman plots<br>Mean difference:                                                                                                                | SD:<br>437 ± 56                                                                                                                                                                                                                                                 |

|                               |                                  |                                                                    |                                                                                                                                                                                           |                                                                                                                                                                          |                                                                                                                                                              |                                                                |
|-------------------------------|----------------------------------|--------------------------------------------------------------------|-------------------------------------------------------------------------------------------------------------------------------------------------------------------------------------------|--------------------------------------------------------------------------------------------------------------------------------------------------------------------------|--------------------------------------------------------------------------------------------------------------------------------------------------------------|----------------------------------------------------------------|
|                               | 52%                              | 40.2, 54,<br>67.2, 79.8,<br>93.6 m/min                             | Digi-Walker SW-200: DWwa<br>(waist)<br>NL-2000: NLwa (waist)                                                                                                                              |                                                                                                                                                                          | APt: 2.6, 0.6, -0.1, 0.4, 0.4<br>SWwa: 184.3, 132.7, 71.8,<br>31.2, 4<br>NLwa: 85.4, 4.8, 0, -0.9, -<br>2.4                                                  | 490 ± 55<br>532 ± 47<br>585 ± 47<br>624 ± 43                   |
| Han <sup>11</sup><br>2020     | 36<br>21.2 ± 4.5<br>18-65<br>50% | 2-min;<br>53.3, 66.7,<br>80, 93.3,<br>106.7<br>m/min               | Garmin Forerunner 235: GMwr<br>(wrist)<br>Polar M430: PLwr (wrist)<br>Garmin Foot Pod: FPf (foot)<br>Polar Stride Sensor Smart: SSf<br>(foot)                                             | MAPE:<br>GMwr: 14.3%, 4.2%, 1.2%,<br>0.9%, 1.0%<br>PLwr: 9.9%, 7.0%, 3.1%,<br>1.5%, 0.5%<br>FPf: 0.4%, 0.5%, 0.5%,<br>0.5%, 0.6%<br>SSf: 0.3%, 0.4%, 0.3%,<br>0.3%, 0.2% | Bland-Altman plots                                                                                                                                           | CCI:<br>GMwr: 0.919<br>PLwr: 0.908<br>FPf: 0.999<br>SSf: 1.000 |
| Horvath <sup>12</sup><br>2007 | 20<br>27.8 ± 8.8<br>45%          | 50 steps;<br>54, 80, 107<br>m/min                                  | Yamax SW200: DWlm (left mid-<br>axillary)<br>Yamax SW200: DWrm (right mid-<br>axillary)<br>Yamax SW200: DWrt (right thigh)<br>Yamax SW200: DWlt (left thigh)<br>Yamax SW200: DWwa (waist) | Not reported                                                                                                                                                             | Net error:<br>DWlm: 7.3%, 0.6%, -1.2%<br>DWrm: 10.5%, 2.1%, -<br>0.5%<br>DWrt: 18.1%, 3.1%, -0.2%<br>DWlt: 10.3%, 1.9%, 0.6%<br>DWwa: 17.7%, 0.4%, -<br>0.8% | Not reported                                                   |
| John <sup>13</sup><br>2018    | 20<br>26.7 ± 4.9<br>40%          | 1-min;<br>53.4, 58.7,<br>64.1, 69.4,<br>74.8, 80.1,<br>85.4, 90.8, | Yamax Digiwalker SW200: DWwa<br>(waist)<br>OmronHJ720ITC: OMwa (waist)<br>ActiGraph GT3X+: 3Xwa (waist)<br>ActiGraph GT3X+: 3Xwr (wrist)                                                  | Not reported                                                                                                                                                             | Bias:<br>DWwa: 1 – 21<br>OMwa: -5 – 6<br>3Xwa: 8 – 39<br>3Xwr: 32 – 46                                                                                       | SD:<br>DWwa: 10-34<br>OMwa: 9-31<br>3Xwa: 7-19<br>3Xwr: 15-26  |

|                              |                                    |                                         |                                                                                                                                                                                                         |                                                                                                                                                           |                                                                                                                                                              |                                                                                                                                                                                   |
|------------------------------|------------------------------------|-----------------------------------------|---------------------------------------------------------------------------------------------------------------------------------------------------------------------------------------------------------|-----------------------------------------------------------------------------------------------------------------------------------------------------------|--------------------------------------------------------------------------------------------------------------------------------------------------------------|-----------------------------------------------------------------------------------------------------------------------------------------------------------------------------------|
|                              |                                    | 96.1, 101.5,<br>106.8<br>m/min          | ActiGraph GT9X: 9Xwa (waist)<br>ActiGraph GT9X: 9Xwr (wrist)                                                                                                                                            |                                                                                                                                                           | 9Xwa: 55 – 64<br>9Xwr: 66 – 72                                                                                                                               | 9Xwa: 19-28<br>9Xwr: 11-18                                                                                                                                                        |
| Jung <sup>14</sup><br>2020   | 32<br>26.03 ± 6.59<br>18-40<br>53% | 5-min;<br>53.6, 107.3<br>m/min          | Fitbit HR: FBwrp (right wrist proximal)<br>Fitbit HR: FBwrd (right wrist distal)<br>Fitbit HR: FBlwrp (left wrist proximal)<br>Fitbit HR: FBlwrd (left wrist distal)                                    | Not reported                                                                                                                                              | Mean difference:<br>FBwrp: -13.47, 19.84<br>FBwrd: -12.22, -6.06<br>FBlwrp: -20.63, 12.59<br>FBlwrd: -12.63, -2.72                                           | 95% CI:<br>FBwrp: (-25.39, -1.55), (-9.05, 48.74)<br>FBwrd: (-25.21, 0.78), (-31.48, 19.36)<br>FBlwrp: (-37.8, -3.45), (-21.49, 46.68)<br>FBlwrd: (-23.7, -1.55), (-25.67, 20.24) |
| Karaca <sup>15</sup><br>2021 | 29<br>26.3 ± 6.2<br>18-40<br>0%    | 2-min;<br>33.3, 66.7,<br>100 m/min      | ActiGraph wGT3X-BT: AGrwr (right wrist)<br>ActiGraph wGT3X-BT: AGlwr (left wrist)<br>ActiGraph wGT3X-BT: AGwa (waist)<br>ActiGraph wGT3X-BT: AGra (right ankle)<br>ActiGraph wGT3X-BT: AGua (upper arm) | MAPE:<br>AGrwr: 41.7%, 16.3%,<br>25.1%<br>AGlwr: 32.3%, 26.5%,<br>28.3%<br>AGwa: 80.0%, 8.3%, 1.2%<br>AGra: 12.4%, 1.0%, 4.9%<br>AGua: 66.5%, 11.7%, 3.3% | Bland-Altman plots:<br>AGrwr: -62.3, -32.7, -64.5<br>AGlwr: -48.6, -54.2, -97<br>AGwa: -120.9, -15.5, 2<br>AGra: -12.2, 1, -12.7<br>AGua: -99.3, -23.2, -5.2 | SD:<br>AGrwr: 48.2-31.5<br>AGlwr: 51.8-37.3<br>AGwa: 34.6-4.5<br>AGra: 39.4-3.6<br>AGua: 27.5-18.7                                                                                |
| Lowe <sup>16</sup><br>2021   | 18<br>30.6<br>18-65<br>56%         | 5-min;<br>53.6, 80.5,<br>107.3<br>m/min | Walk Star: iPhone 5: WSp (pant pocket)<br>Accupedo: Samsung S3 mini: SSp (pant pocket)                                                                                                                  | Not reported                                                                                                                                              | Bland-Altman plots could not be extricated for treadmill                                                                                                     | ICC:<br>WSp: 0.145-0.951<br>SSp: -0.400-0.544<br>DWwa: 0.027-0.383<br>OMwa: 0.631-0.977                                                                                           |

|                               |                                   |                                                                        |                                                                                                                              |                                                                                               |                            |                                                                                                                                                                     |
|-------------------------------|-----------------------------------|------------------------------------------------------------------------|------------------------------------------------------------------------------------------------------------------------------|-----------------------------------------------------------------------------------------------|----------------------------|---------------------------------------------------------------------------------------------------------------------------------------------------------------------|
|                               |                                   |                                                                        | Yamax Digi-Walker CW-700:<br>DWwa (waist)<br>Omron HJ-720ITC: OMwa (waist)<br>Tanita PD-724: TAn (neck)                      |                                                                                               |                            | TAn: 0.391-0.866                                                                                                                                                    |
| Nuss <sup>17</sup><br>2020    | 30<br>22.93 ± 3.3<br>50%          | 7-min;<br>45.6, 67,<br>91.1, 112.6,<br>134.1,<br>147.5, 160.9<br>m/min | ActiGraph: AGrwr (right wrist)<br>ActiGraph: AGLwr (left wrist)<br>ActiGraph: AGrh (right hip)<br>ActiGraph: AGLh (left hip) | MAPE:<br>AGrwr: 50.31-31.33%<br>AGLwr: 50.35-36.84%<br>AGrh: 54.52-1.55%<br>AGlh: 59.97-1.55% | Not reported               | CCC:<br>AGrwr: -0.008 – 0.1<br>AGLwr: -0.006 – 0.08<br>AGrh: -0.004 – 0.99<br>AGlh: -0.002 – 0.92                                                                   |
| O'Brien <sup>18</sup><br>2018 | 43<br>39.4 ± 15.2<br>20-64<br>58% | 6-min;<br>40, 53.3,<br>66.7, 93.3,<br>106.7, 120<br>m/min              | Omron HJ-320: OMwa (waist)<br>ActiGraph GT3X: AGwa (waist)<br>PiezoRx: PRwa (waist)                                          | Not reported                                                                                  | Bland-Altman plots         | ICC:<br>OMwa: 0.14, 0.28, 0.94,<br>0.39, 0.53, 0.66, 0.62<br>AGwa: 0.16, 0.22, 0.70,<br>0.96, 0.93, 0.98, 0.72<br>PRwa: 0.71, 0.80, 0.98,<br>0.99, 0.95, 0.99, 0.97 |
| O'Brien <sup>19</sup><br>2021 | 19<br>68.8 ± 2.3<br>37%           | 6-min;<br>40, 53.3,<br>93.3, 106.7<br>m/min                            | Omron HJ-320: OMwa (waist)<br>ActiGraph GT3X: AGwa (waist)<br>PiezoRx: PRwa (waist)                                          | MAPE:<br>OMwa: 78.3 - 1.5%<br>AGwa: 72.9 - 1.4%<br>PRwa: 8.4 - 1.2%                           | Bland-Altman plots         | ICC:<br>OMwa: 0.26, 0.36, 0.85,<br>0.92, 0.91<br>AGwa: -0.13, -0.20, 0.30,<br>0.94, 0.71<br>PRwa: 0.18, 0.98, 0.96,<br>0.92, 0.90                                   |
| Reil <sup>20</sup><br>2016    | 30<br>27.9 ± 4.2                  | 2-min;                                                                 | ActiGraph wGT3X-BT: AGwa (waist)                                                                                             | Not recorded                                                                                  | Bland-Altman plots<br>MPE: | ICC:<br>AGwa: 0.03, 0.55, 0.64                                                                                                                                      |

|                                |                                                    |                                                         |                                                                                                                                                                                 |                                                                                                                       |                                                                                                                                          |                                                                                                                                |
|--------------------------------|----------------------------------------------------|---------------------------------------------------------|---------------------------------------------------------------------------------------------------------------------------------------------------------------------------------|-----------------------------------------------------------------------------------------------------------------------|------------------------------------------------------------------------------------------------------------------------------------------|--------------------------------------------------------------------------------------------------------------------------------|
|                                | 50%                                                | 53.3, 80,<br>106.7<br>m/min                             | Mother: MOwa (waist)                                                                                                                                                            |                                                                                                                       | AGwa: 26.7%, 3.7%, 2.8%<br>MOwa: 2.5%, 1.3%, 1.9%                                                                                        | MOwa: 0.88, 0.96, 0.89                                                                                                         |
| Rhudy <sup>21</sup><br>2018    | 15<br>20.2 ± 3.8<br>18.2-32.9<br>% not<br>reported | 1.5-min;<br>72 m/min                                    | gyroscope: PEAKwr (wrist)<br>AC - setting: ACwr (wrist)<br>FFT - setting: FFTwr (wrist)<br>gyroscope: PEAKa (ankle)<br>AC - setting: ACa (ankle)<br>FFT - setting: FFTa (ankle) | Not reported                                                                                                          | Bland-Altman plots                                                                                                                       | ICC:<br>PEAKwr: 0.640<br>ACwr: 0.962<br>FFTwr: not reported<br>PEAKa: 0.991<br>ACa: 0.926<br>FFTa: 0.985                       |
| Simonsen <sup>22</sup><br>2020 | 30<br>28.20 ± 4.33<br>13%                          | 3-min;<br>33.3, 50,<br>66.7 m/min                       | Polar M200: PMf (forearm)<br>Polar A300: PAF (forearm)<br>Samsung Galaxy S9: SSp (pant<br>pocket)<br>Dunlop Sport: DSw (waist)                                                  | Not reported                                                                                                          | Bland-Altman plots<br>SES:<br>PMf: 20.39, 14.15, 19.87<br>PAf: 22.43, 14.28, 19.78<br>SSp: 9.17, 9.41, 15.94<br>DSw: 22.40, 14.16, 19.36 | Correlation coefficient:<br>PMf: -0.19, 0.29, 0.23<br>PAf: -0.23, 0.24, 0.13<br>SSp: 0.52, 0.86, 0.76<br>DSw: 0.10, 0.22, 0.32 |
| Svarre <sup>23</sup><br>2020   | 30<br>26.6 ± 6.2<br>18-64<br>60%                   | 5-min;<br>26.7, 40,<br>53.3, 66.7,<br>80, 93.3<br>m/min | Garmin Vivosmart HR: GVwr<br>(wrist)<br>StepWatch 3: SWa (ankle)                                                                                                                | MAPE:<br>GVwr: 26.35%, 3.49%,<br>1.27%, 0.61%, 0.61%,<br>6.45%<br>SWa: 3.60%, 0.35%,<br>0.09%, 0.08%, 0.08%,<br>0.09% | Bland-Altman plots                                                                                                                       | SD (±):<br>GVwr: 23.63, 4.10, 1.67,<br>0.61, 0.68, 11.46<br>SWa: 6.03, 1.00, 0.12, 0.09,<br>0.10, 0.12                         |
| Swartz <sup>24</sup><br>2003   | 66<br>28.6 ± 10<br>47%                             | 3-min;                                                  | Yamax SW-200: DWwaf (waist;<br>front)                                                                                                                                           | Not reported                                                                                                          | MPE: visualized only                                                                                                                     | Not reported                                                                                                                   |

|                               |                    |                                   |                                                                                                                                                                                                                                                                                                                                                                                                                                                                               |                                                                                                                                                                                                                                                                                                                                                                                             |                                                                                                                                                                                                                                                                                                                                                                                                                       |                                                                                                                                                                                                                                                                                            |
|-------------------------------|--------------------|-----------------------------------|-------------------------------------------------------------------------------------------------------------------------------------------------------------------------------------------------------------------------------------------------------------------------------------------------------------------------------------------------------------------------------------------------------------------------------------------------------------------------------|---------------------------------------------------------------------------------------------------------------------------------------------------------------------------------------------------------------------------------------------------------------------------------------------------------------------------------------------------------------------------------------------|-----------------------------------------------------------------------------------------------------------------------------------------------------------------------------------------------------------------------------------------------------------------------------------------------------------------------------------------------------------------------------------------------------------------------|--------------------------------------------------------------------------------------------------------------------------------------------------------------------------------------------------------------------------------------------------------------------------------------------|
|                               |                    | 54, 67, 80,<br>94, 107<br>m/min   | Yamax SW-200: DWwab (waist;<br>back)<br>Yamax SW-200: DWwas (waist;<br>side)                                                                                                                                                                                                                                                                                                                                                                                                  |                                                                                                                                                                                                                                                                                                                                                                                             |                                                                                                                                                                                                                                                                                                                                                                                                                       |                                                                                                                                                                                                                                                                                            |
| Tedesco <sup>25</sup><br>2019 | 18<br>65-74<br>61% | 3-min;<br>16.7, 25,<br>33.3 m/min | Fitbit Charge 2: FCD (D wrist)<br>Fitbit Charge 2: FCND (ND wrist)<br>Garmin VivoSmart HR+: GVD (D<br>wrist)<br>Garmin VivoSmart HR+: GVND<br>(ND wrist)<br>Philips Health Watch: PHD (D<br>wrist)<br>Philips Health Watch: PHND (ND<br>wrist)<br>Withings Pulse Ox: WPD (D wrist)<br>Withings Pulse Ox: WPND (ND<br>wrist)<br>Omron HJ-720ITC: OM (waist)<br>ActiGraph GT9X-BT: AGW<br>(waist)<br>ActiGraph GT9X-BT: AGA<br>(ankle)<br><br>D = dominant<br>ND = non-dominant | MAPE:<br>FCD: 44.53%, 29.31%,<br>27.65%<br>FCND: 44.86%, 28.33%,<br>26.50%<br>GVD: 54.74%, 22.32%,<br>7.78%<br>GVND: 53.01%, 25.66%,<br>9.99%<br>PHD: 51.30%, 28.39%,<br>20.38%<br>PHND: 44.76%, 20.88%,<br>11.24%<br>WPD: 86.07%, 76.20%,<br>59.90%<br>WPND: 86.98%, 81.55%,<br>57.45%<br>OM: 77.60%, 58.92%,<br>32.76%<br>AGW: 87.05%, 77.20%,<br>62.99%<br>AGA: 51.20%, 31.78%,<br>8.87% | Bland - Altman plots:<br>FCD: -101.06, 20.5, -<br>181.18<br>FCND: -91.35, 19.5, 19.19<br>GVD: -118.29, -50.71, -<br>18.63<br>GVND: -111.41, -58.53, -<br>19.75<br>PHD: -110, -44.56, 8.93<br>PHND: -82.65, -29.19,<br>6.31<br>WPD: -200.41, -181.18, -<br>155.31<br>WPND: -201.59, -188.59, -<br>144.56<br>OM: -177.76, -140.59, -<br>84.94<br>AGW: -207.91, -183.65, -<br>159.63<br>AGA: -107.85, -69.21, -<br>19.47 | ICC:<br>FCD: 0.44, 0.30, 0.13<br>FCND: 0.44, 0.41, 0.12<br>GVD: 0.36, 0.64, 0.91<br>GVND: 0.46, 0.58, 0.79<br>PHD: 0.41, 0.44, 0.47<br>PHND: 0.45, 0.44, 0.63<br>WPD: 0.22, 0.13, 0.17<br>WPND: 0.24, 0.18, 0.26<br>OM: 0.24, 0.22, 0.23<br>AGW: 0.11, 0.17, 0.18<br>AGA: 0.51, 0.52, 0.83 |



|                              |                                            |                                                                |                                                                                                                                                                                                                                                                                                                                                                                                                                                                                          |              |                                                                                                                                                                                                                                                                                                                                                      |                                                                                                                                                           |
|------------------------------|--------------------------------------------|----------------------------------------------------------------|------------------------------------------------------------------------------------------------------------------------------------------------------------------------------------------------------------------------------------------------------------------------------------------------------------------------------------------------------------------------------------------------------------------------------------------------------------------------------------------|--------------|------------------------------------------------------------------------------------------------------------------------------------------------------------------------------------------------------------------------------------------------------------------------------------------------------------------------------------------------------|-----------------------------------------------------------------------------------------------------------------------------------------------------------|
| Tophoj <sup>26</sup><br>2018 | 20<br>25.6 ± 2<br>50%                      | 100-steps;<br>33.3, 66.7,<br>75.0, 91.7<br>m/min               | Fitbit Surge: FSwr (wrist)<br>Fitbit Charge HR: FCwr (wrist)<br>Microsoft Band 2: MBwr (wrist)<br>A&D Activity Monitor: ADh (hip)                                                                                                                                                                                                                                                                                                                                                        | Not reported | Bland – Altman plots<br>MPE:<br>FSwr: -8%, -2%, -2%, -6%<br>FCwr: 15%, 18%, 21%,<br>7%<br>MBwr: -15%, 0%, 0%, 0%<br>ADh: -53%, 1%, 2%, 2%                                                                                                                                                                                                            | ICC:<br>FSwr: 0.58<br>FCwr: 0.35<br>MBwr: 0.79<br>ADh: 0.96<br>SD:<br>FSwr: 23, 9, 8, 13<br>FCwr: 56, 50, 36, 36<br>MBwr: 46, 4, 3, 3<br>ADh: 42, 4, 3, 2 |
| Toth <sup>27</sup><br>2017   | 25<br>26 ± 8<br>18-57<br>% not<br>reported | 2-min;<br>26.8, 53.6,<br>80.5, 107.2,<br>134.1, 160.9<br>m/min | StepWatch 3: SWac100 (ankle;<br>cadence setting 100%)<br>StepWatch 3: SWac83 (ankle;<br>cadence setting 83%)<br>StepWatch 3: SWac70 (ankle;<br>cadence setting 70%)<br>StepWatch 3: SWac60 (ankle;<br>cadence setting 60%)<br>StepWatch 3: SWas18 (ankle;<br>sensitivity 18)<br>StepWatch 3: SWas16: (ankle;<br>sensitivity 16)<br>StepWatch 3: SWas14: (ankle;<br>sensitivity 14)<br>StepWatch 3: SWas13: (ankle;<br>sensitivity 13)<br>StepWatch 3: SWas12: (ankle;<br>sensitivity 12) | Not reported | Percentage of Criterion<br>Steps:<br>SWac100: 108.9%, 99.6%,<br>99.6%, 99.4%, 75.5%,<br>70.5%<br>SWac83: 124.0%, 101.6%,<br>99.6%, 99.7%, 98.0%,<br>95.9%<br>SWac70: 130.5%, 121.6%,<br>108.8%, 101.0%, 99.6%,<br>99.4%<br>SWac60: 149.5%, 149.8%,<br>119.3%, 108.4%, 101.0%,<br>100.5%<br>SWas18: 106.8%, 100.3%,<br>100.2%, 99.6%, 98.1%,<br>99.2% | Not reported                                                                                                                                              |

|                                 |                          |                                   |                                                                                                                                                                  |                                                                                                                                   |                                                                                                                                                      |                                                                                                                                                                        |
|---------------------------------|--------------------------|-----------------------------------|------------------------------------------------------------------------------------------------------------------------------------------------------------------|-----------------------------------------------------------------------------------------------------------------------------------|------------------------------------------------------------------------------------------------------------------------------------------------------|------------------------------------------------------------------------------------------------------------------------------------------------------------------------|
|                                 |                          |                                   |                                                                                                                                                                  |                                                                                                                                   | SWas16: 110.5%, 103.4%,<br>104.4%, 99.6%, 99.1%,<br>99.7%                                                                                            |                                                                                                                                                                        |
|                                 |                          |                                   |                                                                                                                                                                  |                                                                                                                                   | SWas14: 126.3%, 115.0%,<br>106.0%, 99.7%, 99.7%,<br>99.6%                                                                                            |                                                                                                                                                                        |
|                                 |                          |                                   |                                                                                                                                                                  |                                                                                                                                   | SWas13: 130.5%, 121.6%,<br>108.8%, 101.0%, 99.6%,<br>99.4%                                                                                           |                                                                                                                                                                        |
|                                 |                          |                                   |                                                                                                                                                                  |                                                                                                                                   | SWas12: 135.8%, 125.2%,<br>111.2%, 101.4%, 100.2%,<br>99.5%                                                                                          |                                                                                                                                                                        |
| Vetrovsky <sup>28</sup><br>2019 | 20<br>34.3 ± 11.6<br>25% | 3-min;<br>40, 50, 60,<br>70 m/min | Fitbit Charge 2: FCwr (wrist)<br>Garmin vivofit 1: G1wr (wrist)<br>Garmin vivofit 3: Gwr3 (wrist)<br>Omron HJ-322U-E: OMwa (waist)<br>SmartLAB walk+: SLn (neck) | MAPE:<br>FBwr: 10%, 4%, 1%, 2%<br>G1wr: 24%, 7%, 3%, 2%<br>G3wr: 13%, 8%, 1%, 1%<br>OMwa: 45%, 7%, 1%, 1%<br>SLn: 18%, 4%, 1%, 1% | MPE:<br>FBwr: 3%, 0%, -1%, -2%<br>G1wr: -24%, -7%, -2%, -<br>2%<br>G3wr: 4%, 4%, -1%, -1%<br>OMwa: -44%, -7%, -1%, -<br>1%<br>SLn: -18%, -3%, 0%, 0% | CCC:<br>FBwr: 0.38, 0.82, 0.99, 0.90<br>G1wr: 0.11, 0.66, 0.95, 0.96<br>G3wr: 0.45, 0.46, 0.99, 0.97<br>OMwa: 0.11, 0.21, 0.99,<br>0.99<br>SLn: 0.22, 0.59, 0.99, 0.98 |

CCC = concordance correlation coefficients; CCI = correlation confidence interval; CI = confidence interval; ICC = intra-class coefficient; MAPE = mean absolute percentage error; MPE = mean percentage error; PE = percent error; SES = standard error of the estimate; SD = standard deviation.

Population descriptions are presented as means ± standard deviation, year ranges, and percent females. Speeds were converted from mph, km/h, or m/s into m/min if necessary.

Values are presented for each speed for each device. Inconsistencies across the rows in the table are due to discrepancies in the article reports.

Search was performed using an expanded Boolean string of (((step\*) AND (treadmill\*)) AND (adult\*)) AND ((valid\*) OR (reliab\*)) in search engines PubMed, SPORTDiscuss, Web of Science, and CINHALL. Studies were included if the validation of step-counting devices was performed on a treadmill at walking speeds using the criterion standard of direct observation in ostensibly healthy adults. The exclusion criteria were: populations under the age of 18 years, indistinguishably combined step data for children/youth and adults, incline > 0% grade, non-standardized treadmill speed, unspecified walking/jogging/running bouts, overground/stair/track walking, and steps not reported as an outcome.

## References

1. Adamakis M. Criterion Validity of iOS and Android Applications to Measure Steps and Distance in Adults. *TECHNOLOGIES*. SEP 2021;9(3).
2. Ali E, Wani D, Ling W, Rao S. Reliability and validity of wrist-worn activity monitors in healthy young adults. *Physiotherapy Practice & Research*. 2018;39(2):117-124.
3. Alinia P, Cain C, Fallahzadeh R, Shahrokni A, Cook D, Ghasemzadeh H. How Accurate Is Your Activity Tracker? A Comparative Study of Step Counts in Low-Intensity Physical Activities. *JMIR Mhealth Uhealth*. Aug 11 2017;5(8):e106.
4. Clemes SA, O'Connell S, Rogan LM, Griffiths PL. Evaluation of a commercially available pedometer used to promote physical activity as part of a national programme. *British Journal of Sports Medicine*. Dec 2010;44(16):1178-1183.
5. De Cocker KA, De Meyer J, De Bourdeaudhuij IM, Cardon GM. Non-traditional wearing positions of pedometers: Validity and reliability of the Omron HJ-203-ED pedometer under controlled and free-living conditions. *Journal of Science and Medicine in Sport*. Sep 2012;15(5):418-424.
6. Ducharme SW, Jongil L, Busa MA, et al. A Transparent Method for Step Detection Using an Acceleration Threshold. *Journal for the Measurement of Physical Behaviour*. 2021;4(4):311-320.
7. Feng Y, Wong CK, Janeja V, Kuber R, Mentis HM. Comparison of tri-axial accelerometers step-count accuracy in slow walking conditions. *Gait & Posture*. 2017:11-16.
8. Fokkema T, Kooiman TJ, Krijnen WP, CP VDS, M DEG. Reliability and Validity of Ten Consumer Activity Trackers Depend on Walking Speed. *Med Sci Sports Exerc*. Apr 2017;49(4):793-800.

9. Foster RC, Lanningham-Foster LM, Manohar C, et al. Precision and accuracy of an ankle-worn accelerometer-based pedometer in step counting and energy expenditure. *Prev Med.* Sep-Oct 2005;41(3-4):778-783.
10. Grant PM, Dall PM, Mitchell SL, Granat MH. Activity-monitor accuracy in measuring step number and cadence in community-dwelling older adults. *Journal of Aging and Physical Activity.* Apr 2008;16(2):201-214.
11. Han H, Kim H, Sun W, Malaska M, Miller B. Validation of wearable activity monitors for real-time cadence. *Journal of Sports Sciences.* Feb 2020;38(4):383-389.
12. Horvath S, Taylor DG, Marsh JP, Kriellaars DJ. The effect of pedometer position and normal gait asymmetry on step count accuracy. *Applied Physiology, Nutrition & Metabolism.* 2007;32(3):409-415.
13. John D, Morton A, Arguello D, Lyden K, Bassett D. "What Is a Step?" Differences in How a Step Is Detected among Three Popular Activity Monitors That Have Impacted Physical Activity Research. *Sensors.* Apr 2018;18(4).
14. Jung HC, Kang M, Lee NH, Jeon S, Lee S. Impact of Placement of Fitbit HR under Laboratory and Free-Living Conditions. *Sustainability.* Aug 2020;12(16).
15. Karaca A, Demirci N, Yilmaz V, Aytar SH, Can S, Unver E. Validation of the ActiGraph wGT3X-BT Accelerometer for Step Counts at Five Different Body Locations in Laboratory Settings. *Measurement in Physical Education and Exercise Science.*
16. Lowe CJM, Isaac C, Kelly P, Barker KL. Measuring step count: why it is important not to assume measures are reliable. *Physiotherapy.* Mar 2021;110:1-4.

17. Nuss KJ, Hulett NA, Erickson A, et al. Comparison of Energy Expenditure and Step Count Measured by ActiGraph Accelerometers Among Dominant and Nondominant Wrist and Hip Sites. *Journal for the Measurement of Physical Behaviour*. 2020;3(4):315-322.
18. O'Brien MW, Wojcik WR, Fowles JR. Medical-Grade Physical Activity Monitoring for Measuring Step Count and Moderate-to-Vigorous Physical Activity: Validity and Reliability Study. *JMIR Mhealth Uhealth*. Sep 5 2018;6(9):e10706.
19. O'Brien MW, Wojcik WR, Fowles JR. Validity and Interinstrument Reliability of a Medical Grade Physical Activity Monitor in Older Adults. *Journal for the Measurement of Physical Behaviour*. 2021;4(1):31-38.
20. Riel H, Rathleff CR, Kalstrup PM, et al. Comparison between Mother, ActiGraph wGT3X-BT, and a hand tally for measuring steps at various walking speeds under controlled conditions. *PeerJ*. 2016;4:e2799.
21. Rhudy MB, Mahoney JM. A comprehensive comparison of simple step counting techniques using wrist- and ankle-mounted accelerometer and gyroscope signals. *Journal of Medical Engineering & Technology*. 2018;42(3):236-243.
22. Simonsen MB, Thomsen MJ, Hirata RP. Validation of different stepping counters during treadmill and over ground walking. *Gait Posture*. Jul 2020;80:80-83.
23. Svarre FR, Jensen MM, Nielsen J, Villumsen M. The validity of activity trackers is affected by walking speed: the criterion validity of Garmin Vivosmart(®) HR and StepWatch(™) 3 for measuring steps at various walking speeds under controlled conditions. *PeerJ*. 2020;8:e9381.

24. Swartz AM, Bassett DR, Moore JB, Thompson DL, Strath SJ. Effects of body mass index on the accuracy of an electronic pedometer. *International Journal of Sports Medicine*. Nov 2003;24(8):588-592.
25. Tedesco S, Sica M, Ancillao A, Timmons S, Barton J, O'Flynn B. Accuracy of consumer-level and research-grade activity trackers in ambulatory settings in older adults. *PLoS One*. May 2019;14(5).
26. Tophøj KH, Petersen MG, Sæbye C, Baad-Hansen T, Wagner S. Validity and Reliability Evaluation of Four Commercial Activity Trackers' Step Counting Performance. *Telemed J E Health*. Sep 2018;24(9):669-677.
27. Toth LP, Bassett DR, Crouter SE, et al. StepWatch accuracy during walking, running, and intermittent activities. *Gait & Posture*. Feb 2017;52:165-170.
28. Vetrovsky T, Siranec M, Marencakova J, et al. Validity of six consumer-level activity monitors for measuring steps in patients with chronic heart failure. *PLoS One*. 2019;14(9):e0222569.
