# Supplementary material for: A catalog of validity indices for step counting wearable technologies during treadmill walking: the CADENCE-adults study
Source: PubMed Central journal article supplement (PMC9461139; doi:10.1186/s12966-022-01350-9), 2022-09-08
Supplement: 12966_2022_1350_MOESM2_ESM.pdf [file 12966_2022_1350_MOESM2_ESM.pdf]

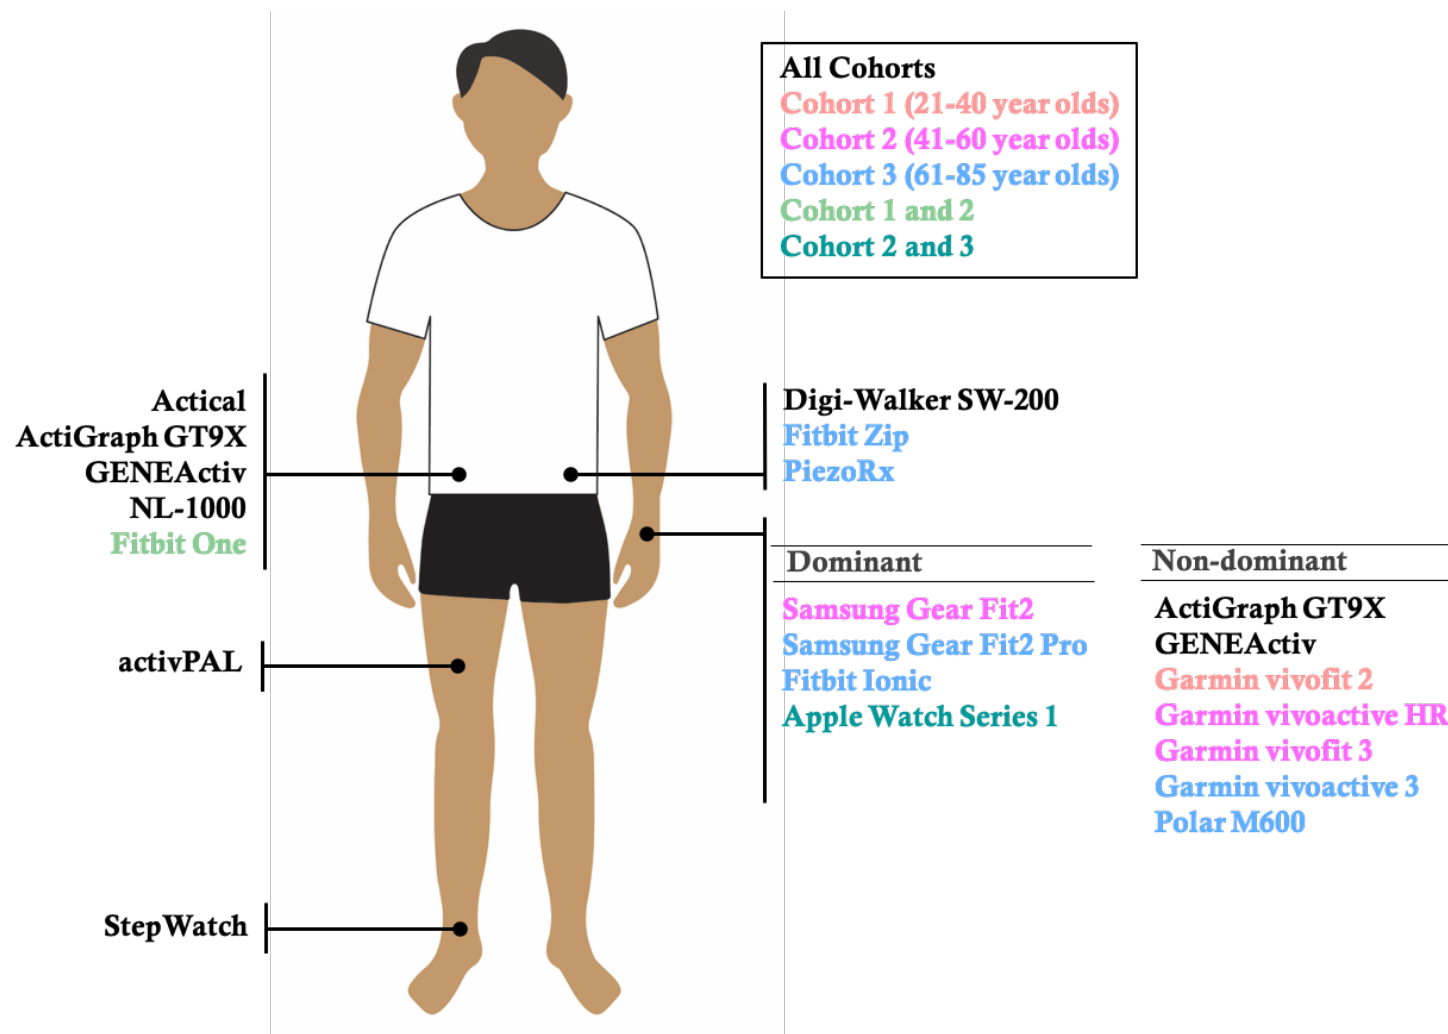

1

2 **Additional file 2: Suppl Fig 1** Visual representation of all wearable technologies and their locations by age cohorts

3 **Additional file 2: Suppl Table 1.** Relation of wearable technologies used in the present study

| <b>Wearable</b>      | <b>Location</b>                    | <b>Digital Display</b> | <b>Data Extraction Software</b>                     | <b>Initial Step Data Resolution (Epoch)</b> | <b>Device Settings and Initialization Information</b>                                                                                                                                                                                                                                                                                                                                                                                                                                                                                                                                    | <b>Commercial availability</b>  |
|----------------------|------------------------------------|------------------------|-----------------------------------------------------|---------------------------------------------|------------------------------------------------------------------------------------------------------------------------------------------------------------------------------------------------------------------------------------------------------------------------------------------------------------------------------------------------------------------------------------------------------------------------------------------------------------------------------------------------------------------------------------------------------------------------------------------|---------------------------------|
| Actical              | Right waist                        | No                     | Actical®<br>(v. 2.12.0002)                          | 1 s                                         | <ul style="list-style-type: none"> <li>• Set “<i>Epoch length</i>” to 1 s.</li> <li>• “<i>Record Steps?</i>” box checked but not the “<i>Raw Data</i>” check box.</li> </ul>                                                                                                                                                                                                                                                                                                                                                                                                             | Available                       |
| ActiGraph GT9X       | Right waist and non-dominant wrist | No                     | ActiLife<br>(v. 6.11.8)                             | 1 s                                         | <ul style="list-style-type: none"> <li>• Sampling rate: 80 Hz.</li> <li>• LED flashes not checked.</li> <li>• “<i>Idle sleep mode</i>” disabled.</li> <li>• “<i>Low Frequency Extension</i>” disabled.</li> <li>• “<i>Enable Wireless</i>” option should be disabled.</li> <li>• “<i>Enable IMU</i>” unchecked.</li> <li>• “<i>By default</i>” algorithm for step counting analysis.</li> <li>• When downloading, make sure the “<i># of Axis:</i>” reads 3. Check “<i>Steps</i>” box but not “<i>Lux</i>”, “<i>Inclinometer</i>”, or “<i>Low Frequency Extension</i>” boxes.</li> </ul> | Available                       |
| activPAL             | Right thigh                        | No                     | activPAL™<br>process and presentation<br>(v. 6.4.1) | 15 s                                        | <ul style="list-style-type: none"> <li>• “<i>Future Time</i>” selected for Start condition.</li> <li>• “<i>Record for 1 day</i>” selected.</li> </ul>                                                                                                                                                                                                                                                                                                                                                                                                                                    | Available                       |
| Apple Watch Series 1 | Dominant wrist                     | Yes                    | N/A                                                 | N/A                                         | <ul style="list-style-type: none"> <li>• Go to “<i>Activity</i>” and press “<i>Get Started</i>”.</li> <li>• Turn the Digital Crown to see the totals. Keep scrolling to see total steps.</li> </ul>                                                                                                                                                                                                                                                                                                                                                                                      | Updated to Apple Watch Series 7 |
| Digi-Walker SW-200   | Left waist                         | Yes                    | N/A                                                 | N/A                                         | <ul style="list-style-type: none"> <li>• Press “<i>RESET</i>” button to clear the currently stored “<i>STEP</i>” value.</li> </ul>                                                                                                                                                                                                                                                                                                                                                                                                                                                       | Available                       |

| <b>Wearable</b>      | <b>Location</b>    | <b>Digital Display</b> | <b>Data Extraction Software</b> | <b>Initial Step Data Resolution (Epoch)</b> | <b>Device Settings and Initialization Information</b>                                                                                                                                                                                                                                                                                                         | <b>Commercial availability</b> |
|----------------------|--------------------|------------------------|---------------------------------|---------------------------------------------|---------------------------------------------------------------------------------------------------------------------------------------------------------------------------------------------------------------------------------------------------------------------------------------------------------------------------------------------------------------|--------------------------------|
| Fitbit Ionic         | Dominant wrist     | Yes                    | N/A                             | N/A                                         | <ul style="list-style-type: none"> <li>• After the device is placed on the location, values will be recorded.</li> <li>• Swipe up from the clock face on the watch to access “Fitbit Today” where the steps are prompted.</li> </ul>                                                                                                                          | Discontinued                   |
| Fitbit One           | Right waist        | Yes                    | N/A                             | N/A                                         | <ul style="list-style-type: none"> <li>• After the device is placed on the location, values will be recorded.</li> <li>• The value of steps and icon is displayed immediately after pressing the tracker’s button for faster viewing.</li> <li>• Before starting the test, the tracker is reset.</li> </ul>                                                   | Updated to FitBit Inspire 2    |
| Fitbit Zip           | Left waist         | Yes                    | N/A                             | N/A                                         | <ul style="list-style-type: none"> <li>• After the device is placed on the location, values will be recorded.</li> <li>• Zip will track and display the steps taken</li> </ul>                                                                                                                                                                                | Discontinued                   |
| Garmin vivoactive 3  | Non-dominant wrist | Yes                    | N/A                             | N/A                                         | <ul style="list-style-type: none"> <li>• The device comes preloaded with widgets that provide at-a glance information. The number of steps taken appears on the steps widget.</li> <li>• Press the “Key” button.</li> <li>• Select “Walk” from all possible activities.</li> <li>• Press “Ready” button and steps will be displayed on the screen.</li> </ul> | Updated to Garmin vivoactive 4 |
| Garmin vivoactive HR | Non-dominant wrist | Yes                    | N/A                             | N/A                                         | <ul style="list-style-type: none"> <li>• The device comes preloaded with widgets that provide at-a glance</li> </ul>                                                                                                                                                                                                                                          | Available                      |

| Wearable         | Location                           | Digital Display | Data Extraction Software | Initial Step Data Resolution (Epoch) | Device Settings and Initialization Information                                                                                                                                                                                                                                                                                                                                                                                                                                               | Commercial availability     |
|------------------|------------------------------------|-----------------|--------------------------|--------------------------------------|----------------------------------------------------------------------------------------------------------------------------------------------------------------------------------------------------------------------------------------------------------------------------------------------------------------------------------------------------------------------------------------------------------------------------------------------------------------------------------------------|-----------------------------|
|                  |                                    |                 |                          |                                      | <p>information. The number of steps taken appears on the steps widget.</p> <ul style="list-style-type: none"> <li>• Press the “Key” button.</li> <li>• Select “<i>Walk</i>” from all possible activities.</li> <li>• Press “<i>Ready</i>” button and steps will be displayed on the screen.</li> </ul>                                                                                                                                                                                       |                             |
| Garmin vivofit 2 | Non-dominant wrist                 | Yes             | N/A                      | N/A                                  | <ul style="list-style-type: none"> <li>• Hold the device key until “<i>Start</i>” appears.</li> <li>• The value of steps and icon is displayed immediately after starting a new activity.</li> </ul>                                                                                                                                                                                                                                                                                         | Updated to Garmin vivofit 4 |
| Garmin vivofit 3 | Non-dominant wrist                 | Yes             | N/A                      | N/A                                  | <ul style="list-style-type: none"> <li>• Hold the device key until “<i>Start</i>” appears. The timer begins.</li> <li>• The value of steps and icon is displayed immediately after starting a new activity.</li> </ul>                                                                                                                                                                                                                                                                       | Updated to Garmin vivofit 4 |
| GENEActiv        | Right waist and non-dominant wrist | No              | GENEActiv PC Software    | 1 s                                  | <ul style="list-style-type: none"> <li>• “<i>Measurement frequency</i>”: 60 Hz.</li> <li>• “<i>Measurement Period</i>”: 1 day 00 hours.</li> <li>• “<i>Recording Start Mode</i>”: At Future Time. Set the start date and time at the time subject orientation is scheduled to begin.</li> <li>• Enter the “<i>Body Location</i>” where the device will be used (right waist or non-dominant wrist).</li> <li>• Select the check box next to the device(s) you wish to initialize.</li> </ul> | Available                   |

| <b>Wearable</b>        | <b>Location</b>    | <b>Digital Display</b> | <b>Data Extraction Software</b> | <b>Initial Step Data Resolution (Epoch)</b> | <b>Device Settings and Initialization Information</b>                                                                                                                                                                                                                                                                                                                                                | <b>Commercial availability</b> |
|------------------------|--------------------|------------------------|---------------------------------|---------------------------------------------|------------------------------------------------------------------------------------------------------------------------------------------------------------------------------------------------------------------------------------------------------------------------------------------------------------------------------------------------------------------------------------------------------|--------------------------------|
|                        |                    |                        |                                 |                                             | <ul style="list-style-type: none"> <li>• Click “<i>Erase &amp; Configure</i>” to initialize the device.</li> <li>• To download data, click on the “<i>Data Extractor</i>” tab.</li> </ul>                                                                                                                                                                                                            |                                |
| New Lifestyles NL-1000 | Right waist        | Yes                    | N/A                             | N/A                                         | <ul style="list-style-type: none"> <li>• Mode button pushed to display “STEPS”.</li> </ul>                                                                                                                                                                                                                                                                                                           | Available                      |
| PiezoRx                | Left waist         | Yes                    | N/A                             | N/A                                         | <ul style="list-style-type: none"> <li>• Open the pedometer’s front cover, reset the device by pressing and holding the “X” button for a few seconds to reset the step count.</li> <li>• Open the pedometer’s front cover and record the step value from the display indicated by the she in the top left corner.</li> </ul>                                                                         | Discontinued                   |
| Polar M600             | Non-dominant wrist | Yes                    | N/A                             | N/A                                         | <ul style="list-style-type: none"> <li>• Press the side power button to open the “<i>Apps</i>” menu, and find and tap “<i>Polar</i>”. The “<i>Polar</i>” app on M600 tracks activity with a 3D accelerometer that records wrist movements.</li> <li>• Click on the “<i>24/7 Activity tracking</i>” feature. This feature is always on and displays the steps progress on the home screen.</li> </ul> | Available                      |
| Samsung Gear Fit2      | Dominant wrist     | Yes                    | N/A                             | N/A                                         | <ul style="list-style-type: none"> <li>• Turn on the device and the home screen will display the number of steps taken.</li> <li>• Tap “<i>Steps</i>” on the “<i>Apps</i>” page.</li> </ul>                                                                                                                                                                                                          | Discontinued                   |

| Wearable              | Location       | Digital Display | Data Extraction Software              | Initial Step Data Resolution (Epoch) | Device Settings and Initialization Information                                                                                                                                                                                                                                                                 | Commercial availability |
|-----------------------|----------------|-----------------|---------------------------------------|--------------------------------------|----------------------------------------------------------------------------------------------------------------------------------------------------------------------------------------------------------------------------------------------------------------------------------------------------------------|-------------------------|
|                       |                |                 |                                       |                                      | <ul style="list-style-type: none"> <li>The current step total and target step number will be displayed.</li> </ul>                                                                                                                                                                                             |                         |
| Samsung Gear Fit2 Pro | Dominant wrist | Yes             | N/A                                   | N/A                                  | <ul style="list-style-type: none"> <li>Turn on the device and the home screen will display the number of steps taken.</li> <li>Tap “Steps” on the “Apps” page.</li> <li>The current step total and target step number will be displayed.</li> </ul>                                                            | Discontinued            |
| StepWatch             | Right ankle    | Yes             | StepWatch™ Analysis Software (v. 3.1) | 60 s                                 | <ul style="list-style-type: none"> <li>Recording Interval of “3 seconds” selected.</li> <li>Select “Later” for the “Start recording steps” option.</li> <li>Select the last option “Other” and manually enter “1 day” for the “Stop recording after” option.</li> <li>“Set to Max” button selected.</li> </ul> | Updated to StepWatch 4  |

4 Devices with “N/A” listed for Data Extraction Software and Initial Step Data Resolution (Epoch) were standalone devices which did  
5 not require interfacing with a computer for data extraction – data read directly from available visual displays at the end of each 5-  
6 minute stage
