# Supplementary material for: A catalog of validity indices for step counting wearable technologies during treadmill walking: the CADENCE-adults study
Source: PubMed Central journal article supplement (PMC9461139; doi:10.1186/s12966-022-01350-9), 2022-09-08
Supplement: 12966_2022_1350_MOESM3_ESM.pdf [file 12966_2022_1350_MOESM3_ESM.pdf]

**Additional File 3: Suppl Table 1** Sample sizes (*n*) and number of steps derived from direct observation and each wearable technology at each treadmill speed for all sample (21–85 years)

|                                 | Treadmill speed, km/h (mph) |                             |                             |                             |                             |                             |                             |                             |                              |                              |
|---------------------------------|-----------------------------|-----------------------------|-----------------------------|-----------------------------|-----------------------------|-----------------------------|-----------------------------|-----------------------------|------------------------------|------------------------------|
|                                 | Slow                        |                             |                             |                             | Normal                      |                             |                             |                             | Fast                         |                              |
|                                 | 0.8 (0.5)                   | 1.6 (1.0)                   | 2.4 (1.5)                   | 3.2 (2.0)                   | 4.0 (2.5)                   | 4.8 (3.0)                   | 5.6 (3.5)                   | 6.4 (4.0)                   | 7.2 (4.5)                    | 8.0 (5.0)                    |
| <i>n</i>                        | 258                         | 248                         | 245                         | 239                         | 232                         | 223                         | 194                         | 128                         | 40                           | 5                            |
| <b>Direct observation</b>       | 282.8 ± 96.9<br>(140 – 657) | 365.4 ± 69.4<br>(195 – 666) | 431.9 ± 52.1<br>(326 – 707) | 484.7 ± 39.0<br>(386 – 653) | 529.4 ± 33.2<br>(445 – 648) | 568.9 ± 32.2<br>(501 – 659) | 603.9 ± 34.4<br>(528 – 718) | 644.0 ± 37.8<br>(562 – 742) | 689.3 ± 43.2<br>(620 – 780)  | 727.4 ± 42.6<br>(675 – 787)  |
| <i>n</i>                        | 250                         | 241                         | 238                         | 232                         | 226                         | 218                         | 190                         | 125                         | 39                           | 5                            |
| <b>Actical</b>                  | 2.8 ± 21.8<br>(0 – 278)     | 21.2 ± 56.9<br>(0 – 650)    | 176.1 ± 128.9<br>(0 – 630)  | 419.7 ± 110.9<br>(0 – 648)  | 527.8 ± 78.5<br>(0 – 660)   | 564.9 ± 93.4<br>(0 – 675)   | 602.3 ± 94.7<br>(0 – 738)   | 642.0 ± 108.9<br>(0 – 818)  | 704.6 ± 43.9<br>(635 – 820)  | 740.0 ± 41.8<br>(685 – 795)  |
| <i>n</i>                        | 254                         | 244                         | 241                         | 235                         | 229                         | 220                         | 191                         | 126                         | 40                           | 5                            |
| <b>ActiGraph GT9X (Waist)</b>   | 7.8 ± 28.8<br>(0 – 283)     | 64.5 ± 74.5<br>(0 – 505)    | 202.9 ± 103.0<br>(3 – 448)  | 418.9 ± 87.2<br>(30 – 558)  | 520.7 ± 49.1<br>(255 – 603) | 567.2 ± 62.9<br>(3 – 675)   | 605.5 ± 51.7<br>(308 – 713) | 633.5 ± 87.8<br>(0 – 815)   | 654.6 ± 104.9<br>(315 – 803) | 607.0 ± 119.7<br>(418 – 728) |
| <i>n</i>                        | 254                         | 244                         | 241                         | 235                         | 229                         | 220                         | 192                         | 126                         | 40                           | 5                            |
| <b>ActiGraph GT9X (Wrist)</b>   | 52.1 ± 59.2<br>(0 – 315)    | 99.6 ± 67.7<br>(0 – 343)    | 118.6 ± 80.4<br>(0 – 413)   | 169.9 ± 95.2<br>(0 – 495)   | 235.8 ± 83.8<br>(5 – 563)   | 277.6 ± 75.6<br>(23 – 608)  | 310.0 ± 68.7<br>(68 – 738)  | 328.1 ± 59.2<br>(30 – 648)  | 357.6 ± 80.4<br>(245 – 800)  | 371.0 ± 22.7<br>(340 – 398)  |
| <i>n</i>                        | 249                         | 239                         | 236                         | 230                         | 225                         | 217                         | 188                         | 124                         | 39                           | 5                            |
| <b>activPAL</b>                 | 183.1 ± 121.9<br>(0 – 620)  | 352.6 ± 80.1<br>(20 – 660)  | 431.8 ± 50.8<br>(325 – 665) | 484.6 ± 39.4<br>(380 – 650) | 530.5 ± 33.2<br>(445 – 650) | 569.4 ± 38.8<br>(270 – 665) | 605.9 ± 34.4<br>(530 – 725) | 646.0 ± 38.0<br>(560 – 775) | 686.8 ± 38.2<br>(620 – 760)  | 717.0 ± 39.0<br>(675 – 780)  |
| <i>n</i>                        | 174                         | 164                         | 161                         | 155                         | 149                         | 140                         | 117                         | 60                          | 15                           | 1                            |
| <b>Apple Watch Series 1*</b>    | 108.6 ± 157.5<br>(0 – 641)  | 291.0 ± 132.8<br>(0 – 666)  | 423.5 ± 74.6<br>(115 – 701) | 475.9 ± 58.6<br>(98 – 728)  | 524.1 ± 64.1<br>(399 – 981) | 565.5 ± 42.6<br>(449 – 681) | 587.6 ± 59.4<br>(217 – 740) | 630.6 ± 67.0<br>(272 – 751) | 697.5 ± 62.2<br>(624 – 850)  | 662.0                        |
| <i>n</i>                        | 258                         | 248                         | 245                         | 238                         | 232                         | 220                         | 194                         | 127                         | 40                           | 5                            |
| <b>Digiwalker SW-200</b>        | 23.0 ± 56.0<br>(0 – 435)    | 100.8 ± 116.3<br>(0 – 659)  | 241.5 ± 145.0<br>(0 – 703)  | 352.7 ± 139.4<br>(0 – 710)  | 448.1 ± 120.3<br>(23 – 642) | 527.0 ± 90.9<br>(57 – 653)  | 582.4 ± 67.1<br>(302 – 700) | 636.9 ± 45.9<br>(427 – 734) | 688.3 ± 46.3<br>(570 – 780)  | 730.2 ± 47.7<br>(675 – 801)  |
| <i>n</i>                        | 98                          | 89                          | 86                          | 81                          | 75                          | 66                          | 48                          | 17                          | 3                            |                              |
| <b>Fitbit Ionic<sup>†</sup></b> | 48.3 ± 118.4<br>(0 – 526)   | 185.9 ± 160.9<br>(0 – 534)  | 404.1 ± 90.2<br>(22 – 581)  | 477.4 ± 49.6<br>(385 – 640) | 517.6 ± 40.3<br>(384 – 634) | 550.2 ± 42.8<br>(420 – 659) | 576.0 ± 52.1<br>(442 – 705) | 629.7 ± 53.1<br>(534 – 749) | 631.0 ± 44.6<br>(580 – 663)  |                              |
| <i>n</i>                        | 160                         | 159                         | 159                         | 158                         | 157                         | 156                         | 146                         | 110                         | 37                           | 6                            |
| <b>Fitbit One<sup>‡</sup></b>   | 6.0 ± 32.1<br>(0 – 344)     | 211.1 ± 135.4<br>(0 – 666)  | 412.8 ± 48.7<br>(317 – 665) | 477.1 ± 35.6<br>(382 – 651) | 526.0 ± 32.3<br>(442 – 647) | 566.5 ± 32.5<br>(498 – 652) | 601.7 ± 32.7<br>(528 – 675) | 642.0 ± 37.8<br>(562 – 740) | 686.9 ± 43.9<br>(620 – 780)  | 605.2 ± 299.1<br>(0 – 786)   |

|                                          |                             |                             |                             |                             |                             |                             |                              |                               |                              |                              |
|------------------------------------------|-----------------------------|-----------------------------|-----------------------------|-----------------------------|-----------------------------|-----------------------------|------------------------------|-------------------------------|------------------------------|------------------------------|
| <i>n</i>                                 | 98                          | 89                          | 86                          | 81                          | 75                          | 66                          | 48                           | 17                            | 3                            |                              |
| <b>Fitbit Zip<sup>†</sup></b>            | 3.8 ± 27.5<br>(0 – 267)     | 35.4 ± 75.6<br>(0 – 383)    | 385.7 ± 124.6<br>(0 – 563)  | 480.1 ± 63.4<br>(29 – 608)  | 533.1 ± 62.3<br>(467 – 979) | 566.1 ± 31.9<br>(503 – 652) | 603.6 ± 38.6<br>(526 – 712)  | 644.8 ± 41.3<br>(563 – 738)   | 681.0 ± 39.2<br>(640 – 718)  |                              |
| <i>n</i>                                 | 96                          | 89                          | 86                          | 80                          | 73                          | 66                          | 48                           | 17                            | 3                            |                              |
| <b>Garmin vivoactive 3<sup>†</sup></b>   | 47.7 ± 114.6<br>(0 – 553)   | 271.0 ± 156.7<br>(0 – 550)  | 430.6 ± 64.8<br>(236 – 636) | 482.1 ± 37.2<br>(398 – 573) | 515.2 ± 54.4<br>(154 – 615) | 564.0 ± 33.0<br>(495 – 655) | 597.2 ± 34.4<br>(527 – 707)  | 637.4 ± 38.7<br>(558 – 707)   | 671.3 ± 31.9<br>(637 – 700)  |                              |
| <i>n</i>                                 | 77                          | 76                          | 75                          | 74                          | 75                          | 75                          | 69                           | 44                            | 12                           | 1                            |
| <b>Garmin vivoactive HR<sup>**</sup></b> | 35.1 ± 102.6<br>(0 – 502)   | 308.5 ± 146.2<br>(0 – 665)  | 402.8 ± 70.0<br>(47 – 627)  | 471.0 ± 38.3<br>(379 – 619) | 518.5 ± 31.0<br>(437 – 595) | 546.5 ± 45.6<br>(322 – 603) | 556.8 ± 78<br>.0 (329 – 897) | 527.2 ± 90.1<br>(326 – 727)   | 510.4 ± 105.9<br>(369 – 663) | 492.0                        |
| <i>n</i>                                 | 80                          | 80                          | 80                          | 80                          | 79                          | 78                          | 73                           | 64                            | 25                           | 4                            |
| <b>Garmin vivofit 2<sup>††</sup></b>     | 15.5 ± 66.3<br>(0 – 525)    | 267.1 ± 130.8<br>(0 – 565)  | 401.7 ± 41.3<br>(320 – 515) | 472.7 ± 33.7<br>(390 – 555) | 524.9 ± 28.6<br>(460 – 580) | 554.1 ± 36.9<br>(395 – 625) | 547.9 ± 71.9<br>(295 – 675)  | 531.2 ± 105.1<br>(265 – 665)  | 572.4 ± 129.6<br>(325 – 790) | 595.0 ± 102.7<br>(460 – 710) |
| <i>n</i>                                 | 77                          | 76                          | 76                          | 75                          | 75                          | 72                          | 70                           | 45                            | 12                           | 1                            |
| <b>Garmin vivofit 3<sup>**</sup></b>     | 60.3 ± 123.0<br>(0 – 567)   | 337.1 ± 117.9<br>(21 – 665) | 465.6 ± 95.2<br>(329 – 727) | 477.9 ± 40.4<br>(413 – 651) | 521.9 ± 34.7<br>(435 – 643) | 566.8 ± 40.3<br>(497 – 757) | 599.3 ± 42.7<br>(527 – 819)  | 637.9 ± 42.3<br>(563 – 725)   | 696.6 ± 52.3<br>(631 – 795)  | 781.0                        |
| <i>n</i>                                 | 224                         | 215                         | 214                         | 210                         | 208                         | 201                         | 179                          | 122                           | 39                           | 5                            |
| <b>GENEActiv (Waist)</b>                 | 236.3 ± 100.4<br>(30 – 625) | 382.8 ± 75.5<br>(150 – 663) | 430.6 ± 50.4<br>(325 – 660) | 481.4 ± 37.9<br>(385 – 645) | 529.3 ± 33.3<br>(445 – 650) | 567.9 ± 35.5<br>(365 – 665) | 605.2 ± 36.7<br>(468 – 725)  | 640.6 ± 72.2<br>(0 – 798)     | 694.9 ± 43.2<br>(623 – 788)  | 729.5 ± 42.6<br>(673 – 780)  |
| <i>n</i>                                 | 217                         | 209                         | 207                         | 203                         | 201                         | 194                         | 175                          | 118                           | 40                           | 5                            |
| <b>GENEActiv (Wrist)</b>                 | 212.9 ± 106.6<br>(3 – 623)  | 392.4 ± 66.5<br>(208 – 670) | 429.9 ± 45.4<br>(338 – 690) | 471.2 ± 41.3<br>(333 – 625) | 503.2 ± 51.0<br>(325 – 625) | 525.4 ± 70.1<br>(295 – 665) | 538.3 ± 90.7<br>(318 – 723)  | 552.1 ± 105.2<br>(303 – 740)  | 566.4 ± 126.4<br>(370 – 805) | 578.5 ± 99.4<br>(425 – 685)  |
| <i>n</i>                                 | 258                         | 248                         | 245                         | 239                         | 232                         | 222                         | 194                          | 126                           | 40                           | 5                            |
| <b>NL-1000</b>                           | 12.4 ± 46.4<br>(0 – 435)    | 95.8 ± 113.0<br>(0 – 679)   | 342.0 ± 120.6<br>(3 – 664)  | 458.8 ± 62.7<br>(74 – 653)  | 519.7 ± 59.2<br>(55 – 645)  | 565.2 ± 60.8<br>(90 – 967)  | 597.8 ± 60.4<br>(62 – 715)   | 643.7 ± 37.5<br>(562 – 741)   | 687.1 ± 41.1<br>(620 – 780)  | 723.6 ± 46.3<br>(670 – 793)  |
| <i>n</i>                                 | 98                          | 89                          | 85                          | 81                          | 75                          | 66                          | 48                           | 17                            | 3                            |                              |
| <b>PiezoRx<sup>†</sup></b>               | 85.7 ± 132.0<br>(0 – 553)   | 342.0 ± 126.9<br>(0 – 568)  | 448.2 ± 54.5<br>(217 – 578) | 489.3 ± 37.6<br>(406 – 610) | 530.8 ± 34.5<br>(465 – 639) | 570.0 ± 33.4<br>(502 – 657) | 594.2 ± 82.1<br>(105 – 717)  | 672.5 ± 130.1<br>(566 – 1159) | 680.7 ± 36.7<br>(642 – 715)  |                              |
| <i>n</i>                                 | 97                          | 87                          | 85                          | 80                          | 74                          | 65                          | 47                           | 17                            | 3                            |                              |
| <b>Polar M600<sup>†</sup></b>            | 62.3 ± 123.6<br>(0 – 512)   | 174.0 ± 160.2<br>(4 – 564)  | 347.3 ± 134.7<br>(34 – 578) | 463.4 ± 86<br>(20 – 617)    | 510.8 ± 65.6<br>(292 – 803) | 552.4 ± 82.5<br>(24 – 708)  | 585.6 ± 63.8<br>(456 – 844)  | 626.2 ± 47.4<br>(548 – 731)   | 666.7 ± 36.1<br>(635 – 706)  |                              |
| <i>n</i>                                 | 80                          | 79                          | 79                          | 77                          | 77                          | 78                          | 73                           | 47                            | 12                           | 1                            |
| <b>Samsung Gear Fit2<sup>**</sup></b>    | 18.4 ± 75.9<br>(0 – 485)    | 106.1 ± 147.7<br>(0 – 631)  | 407.2 ± 119.4<br>(31 – 717) | 467.1 ± 67.6<br>(1 – 638)   | 514.4 ± 36.7<br>(398 – 621) | 557.7 ± 37.9<br>(467 – 664) | 590.3 ± 33.8<br>(494 – 660)  | 627.0 ± 38.8<br>(557 – 711)   | 610.1 ± 69.0<br>(474 – 683)  | 620.0                        |

|                                           |                             |                             |                             |                             |                             |                             |                             |                             |                             |                             |
|-------------------------------------------|-----------------------------|-----------------------------|-----------------------------|-----------------------------|-----------------------------|-----------------------------|-----------------------------|-----------------------------|-----------------------------|-----------------------------|
| <i>n</i>                                  | 98                          | 89                          | 86                          | 81                          | 74                          | 66                          | 48                          | 17                          | 3                           |                             |
| <b>Samsung Gear Fit2 Pro</b> <sup>†</sup> | 33.9 ± 103.1<br>(0 – 589)   | 143.1 ± 157.7<br>(0 – 529)  | 386.4 ± 136.0<br>(0 – 679)  | 468.9 ± 38.9<br>(394 – 577) | 508.8 ± 40.3<br>(439 – 613) | 552.6 ± 41.9<br>(356 – 658) | 584.9 ± 34.9<br>(485 – 685) | 609.2 ± 27.5<br>(559 – 662) | 637.0 ± 12.5<br>(625 – 650) |                             |
| <i>n</i>                                  | 253                         | 243                         | 240                         | 234                         | 227                         | 218                         | 189                         | 125                         | 40                          | 5                           |
| <b>StepWatch</b>                          | 271.7 ± 109.7<br>(45 – 625) | 387.9 ± 65.0<br>(200 – 670) | 433.8 ± 50.7<br>(355 – 690) | 484.9 ± 38.3<br>(395 – 648) | 530.3 ± 33.1<br>(450 – 650) | 568.7 ± 37.2<br>(310 – 665) | 605.2 ± 32.9<br>(530 – 700) | 640.7 ± 35.6<br>(520 – 705) | 636.0 ± 54.9<br>(530 – 705) | 593.0 ± 86.9<br>(520 – 700) |

Values represent the average number of steps ± standard deviation (minimum – maximum). \*AppleWatch Series 1 was worn by Middle-Age (41–60 years) and Older Adults (61–85 years). †Fitbit Ionic, Fitbit Zip, Garmin vivoactive 3, PiezoRx, Polar M600, Samsung Gear Fit2 Pro were worn by Older Adults (61–85 years). ‡Fitbit One was worn by Young (21–41 years) and Middle-Age Adults (41–60 years). \*\*Garmin vivoactive HR, Garmin vivofit 3, Samsung Gear Fit2 were worn by Middle-Age Adults (41–60 years). ††Garmin vivofit 2 was worn by Young Adults (21–41 years). See **Additional file 2** for a graphical classification of wearable technologies by age groups.

**Additional File 3: Suppl Table 2** Sample sizes (*n*) and number of steps derived from direct observation and each wearable technology at each treadmill speed for Young Adults (21–40 years)

|                               | Treadmill speed, km/h (mph) |                             |                             |                             |                             |                             |                             |                              |                              |                              |
|-------------------------------|-----------------------------|-----------------------------|-----------------------------|-----------------------------|-----------------------------|-----------------------------|-----------------------------|------------------------------|------------------------------|------------------------------|
|                               | Slow                        |                             |                             |                             | Normal                      |                             |                             |                              | Fast                         |                              |
|                               | 0.8 (0.5)                   | 1.6 (1.0)                   | 2.4 (1.5)                   | 3.2 (2.0)                   | 4.0 (2.5)                   | 4.8 (3.0)                   | 5.6 (3.5)                   | 6.4 (4.0)                    | 7.2 (4.5)                    | 8.0 (5.0)                    |
| <i>n</i>                      | 80                          | 80                          | 80                          | 80                          | 79                          | 78                          | 73                          | 64                           | 25                           | 4                            |
| <b>Direct observation</b>     | 225.3 ± 61.1<br>(140 – 505) | 337.5 ± 44.9<br>(265 – 525) | 418.0 ± 39.3<br>(360 – 550) | 480.3 ± 32.1<br>(425 – 575) | 529.2 ± 30.1<br>(465 – 605) | 568.3 ± 30.2<br>(505 – 635) | 606.0 ± 31.1<br>(540 – 675) | 642.9 ± 32.1<br>(575 – 715)  | 685.0 ± 43.4<br>(620 – 780)  | 712.5 ± 30.7<br>(675 – 740)  |
| <i>n</i>                      | 78                          | 78                          | 78                          | 78                          | 77                          | 76                          | 71                          | 62                           | 25                           | 4                            |
| <b>Actical</b>                | 1.6 ± 8.4<br>(0 – 70)       | 27.1 ± 52.9<br>(0 – 370)    | 224.3 ± 123.5<br>(0 – 520)  | 451.3 ± 86.8<br>(0 – 558)   | 531.4 ± 68.5<br>(0 – 615)   | 562.3 ± 97.9<br>(0 – 648)   | 607.7 ± 79.7<br>(0 – 685)   | 644.0 ± 89.6<br>(0 – 728)    | 699.0 ± 44.2<br>(635 – 820)  | 726.3 ± 32.8<br>(685 – 755)  |
| <i>n</i>                      | 79                          | 79                          | 79                          | 79                          | 78                          | 77                          | 72                          | 63                           | 25                           | 4                            |
| <b>ActiGraph GT9X (Waist)</b> | 3.8 ± 8.2<br>(0 – 45)       | 63.4 ± 64.7<br>(0 – 260)    | 207.7 ± 102.5<br>(23 – 425) | 440.9 ± 77.6<br>(68 – 558)  | 522.6 ± 52.7<br>(263 – 588) | 556.0 ± 83.8<br>(3 – 648)   | 601.0 ± 60.0<br>(308 – 685) | 634.0 ± 71.3<br>(323 – 728)  | 656.6 ± 93.2<br>(358 – 803)  | 576.9 ± 114.3<br>(418 – 685) |
| <i>n</i>                      | 79                          | 79                          | 79                          | 79                          | 78                          | 77                          | 72                          | 63                           | 25                           | 4                            |
| <b>ActiGraph GT9X (Wrist)</b> | 49.8 ± 41.7<br>(0 – 200)    | 109.4 ± 53.5<br>(25 – 310)  | 114.6 ± 62.5<br>(8 – 253)   | 166.7 ± 86.8<br>(3 – 378)   | 233.9 ± 75.8<br>(5 – 513)   | 269.7 ± 61.5<br>(78 – 575)  | 299.7 ± 54.5<br>(113 – 620) | 322.0 ± 51.8<br>(168 – 648)  | 361.1 ± 95.4<br>(260 – 800)  | 364.4 ± 19.8<br>(340 – 385)  |
| <i>n</i>                      | 76                          | 76                          | 76                          | 76                          | 75                          | 74                          | 69                          | 61                           | 24                           | 4                            |
| <b>activPAL</b>               | 151.1 ± 89.4<br>(0 – 455)   | 328.0 ± 56.2<br>(165 – 500) | 418.1 ± 39.0<br>(355 – 550) | 479.8 ± 32.1<br>(420 – 575) | 529.9 ± 29.8<br>(465 – 605) | 564.7 ± 45.9<br>(270 – 640) | 606.8 ± 31.1<br>(540 – 675) | 644.5 ± 32.4<br>(580 – 715)  | 679.4 ± 36.8<br>(620 – 745)  | 701.3 ± 19.3<br>(675 – 720)  |
| <i>n</i>                      | 80                          | 80                          | 80                          | 80                          | 79                          | 78                          | 73                          | 64                           | 25                           | 4                            |
| <b>Digiwalker SW-200</b>      | 19.3 ± 53.0<br>(0 – 435)    | 107.4 ± 103.6<br>(0 – 510)  | 277.3 ± 127.8<br>(0 – 585)  | 401.2 ± 99.6<br>(120 – 710) | 497.9 ± 55.4<br>(335 – 595) | 559.2 ± 39.3<br>(415 – 625) | 605.3 ± 36.6<br>(495 – 700) | 641.7 ± 33.5<br>(535 – 705)  | 685.0 ± 47.3<br>(570 – 780)  | 712.5 ± 30.7<br>(675 – 740)  |
| <i>n</i>                      | 80                          | 80                          | 80                          | 80                          | 79                          | 78                          | 73                          | 64                           | 25                           | 5                            |
| <b>Fitbit One</b>             | 2.8 ± 16.2<br>(0 – 135)     | 208.9 ± 119.0<br>(0 – 475)  | 413.4 ± 48.9<br>(320 – 655) | 477.5 ± 31.2<br>(425 – 570) | 527.2 ± 29.9<br>(460 – 605) | 567.4 ± 31.4<br>(505 – 645) | 605.1 ± 31.0<br>(535 – 675) | 641.4 ± 33.3<br>(575 – 715)  | 683.8 ± 42.9<br>(620 – 780)  | 569.0 ± 319.3<br>(0 – 740)   |
| <i>n</i>                      | 80                          | 80                          | 80                          | 80                          | 79                          | 78                          | 73                          | 64                           | 25                           | 4                            |
| <b>Garmin vivofit 2</b>       | 15.5 ± 66.3<br>(0 – 525)    | 267.1 ± 130.8<br>(0 – 565)  | 401.7 ± 41.3<br>(320 – 515) | 472.7 ± 33.7<br>(390 – 555) | 524.9 ± 28.6<br>(460 – 580) | 554.1 ± 36.9<br>(395 – 625) | 547.9 ± 71.9<br>(295 – 675) | 531.2 ± 105.1<br>(265 – 665) | 572.4 ± 129.6<br>(325 – 790) | 595.0 ± 102.7<br>(460 – 710) |
| <i>n</i>                      | 78                          | 78                          | 78                          | 78                          | 77                          | 76                          | 71                          | 62                           | 25                           | 4                            |
| <b>GENEActiv (Waist)</b>      | 245.6 ± 65.0<br>(95 – 440)  | 385.6 ± 72.9<br>(215 – 583) | 421.3 ± 44.0<br>(325 – 538) | 477.0 ± 32.2<br>(410 – 558) | 529.0 ± 29.5<br>(465 – 603) | 565.1 ± 37.7<br>(365 – 638) | 604.4 ± 35.2<br>(468 – 673) | 641.7 ± 37.8<br>(493 – 715)  | 689.5 ± 43.1<br>(623 – 788)  | 716.9 ± 36.8<br>(673 – 755)  |

|                              |                            |                             |                              |                             |                             |                             |                             |                             |                              |                             |
|------------------------------|----------------------------|-----------------------------|------------------------------|-----------------------------|-----------------------------|-----------------------------|-----------------------------|-----------------------------|------------------------------|-----------------------------|
| <i>n</i>                     | 76                         | 76                          | 76                           | 76                          | 75                          | 74                          | 70                          | 61                          | 25                           | 4                           |
| <b>GENEActiv<br/>(Wrist)</b> | 216.3 ± 83.7<br>(40 – 468) | 388.8 ± 56.7<br>(243 – 565) | 424.0 ± 32.3<br>(360 – 510)  | 461.9 ± 35.6<br>(345 – 538) | 488.7 ± 55.7<br>(325 – 563) | 507.1 ± 67.2<br>(350 – 605) | 506.0 ± 91.4<br>(320 – 635) | 523.3 ± 99.6<br>(303 – 653) | 563.2 ± 128.5<br>(370 – 805) | 616.9 ± 57.9<br>(553 – 685) |
| <i>n</i>                     | 80                         | 80                          | 80                           | 80                          | 79                          | 78                          | 73                          | 64                          | 25                           | 4                           |
| <b>NL-1000</b>               | 9.6 ± 51.9<br>(0 – 435)    | 93.2 ± 116.2<br>(0 – 600)   | 359.9 ± 112.1<br>(115 – 625) | 474.9 ± 45.6<br>(315 – 600) | 521.6 ± 61.0<br>(55 – 610)  | 570.1 ± 30.2<br>(505 – 635) | 606.8 ± 31.5<br>(535 – 675) | 643.6 ± 32.4<br>(575 – 715) | 683.0 ± 41.3<br>(620 – 780)  | 706.3 ± 29.3<br>(670 – 730) |
| <i>n</i>                     | 79                         | 79                          | 79                           | 79                          | 78                          | 77                          | 72                          | 63                          | 25                           | 4                           |
| <b>StepWatch</b>             | 218.7 ± 66.0<br>(90 – 505) | 369.1 ± 50.0<br>(240 – 520) | 418.2 ± 37.9<br>(365 – 540)  | 479.6 ± 31.9<br>(420 – 575) | 529.9 ± 29.6<br>(470 – 605) | 565.3 ± 41.9<br>(310 – 640) | 606.5 ± 31.0<br>(540 – 675) | 643.1 ± 30.0<br>(580 – 705) | 639.4 ± 49.2<br>(535 – 705)  | 607.5 ± 93.1<br>(520 – 700) |

Values represent the average number of steps ± standard deviation (minimum – maximum). See **Additional file 2** for a graphical classification of wearable technologies by age groups.

**Additional File 3: Suppl Table 3** Sample sizes (*n*) and number of steps derived from direct observation and each wearable technology at each treadmill speed for Middle-Age Adults (41–60 years)

|                               | Treadmill speed, km/h (mph) |                             |                             |                             |                             |                             |                             |                             |                              |           |
|-------------------------------|-----------------------------|-----------------------------|-----------------------------|-----------------------------|-----------------------------|-----------------------------|-----------------------------|-----------------------------|------------------------------|-----------|
|                               | Slow                        |                             |                             |                             | Normal                      |                             |                             |                             | Fast                         |           |
|                               | 0.8 (0.5)                   | 1.6 (1.0)                   | 2.4 (1.5)                   | 3.2 (2.0)                   | 4.0 (2.5)                   | 4.8 (3.0)                   | 5.6 (3.5)                   | 6.4 (4.0)                   | 7.2 (4.5)                    | 8.0 (5.0) |
| <i>n</i>                      | 80                          | 79                          | 79                          | 78                          | 78                          | 78                          | 73                          | 47                          | 12                           | 1         |
| <b>Direct observation</b>     | 262.5 ± 84.9<br>(154 – 604) | 351.0 ± 71.1<br>(195 – 666) | 423.0 ± 54.3<br>(326 – 707) | 480.6 ± 41.2<br>(386 – 653) | 527.8 ± 34.8<br>(445 – 648) | 568.1 ± 34.2<br>(501 – 655) | 600.4 ± 34.3<br>(528 – 676) | 644.5 ± 43.8<br>(562 – 739) | 699.3 ± 45.3<br>(639 – 759)  | 787.0     |
| <i>n</i>                      | 78                          | 77                          | 77                          | 76                          | 76                          | 76                          | 71                          | 46                          | 11                           | 1         |
| <b>Actical</b>                | 6.7 ± 38.0<br>(0 – 278)     | 28.0 ± 80.4<br>(0 – 650)    | 177.9 ± 130.4<br>(0 – 630)  | 426.8 ± 88.8<br>(218 – 648) | 535.2 ± 33.1<br>(453 – 655) | 578.0 ± 34.6<br>(510 – 670) | 610.7 ± 33.8<br>(543 – 680) | 644.6 ± 108.5<br>(0 – 818)  | 713.9 ± 43.3<br>(660 – 795)  | 795.0     |
| <i>n</i>                      | 79                          | 78                          | 78                          | 77                          | 77                          | 77                          | 72                          | 46                          | 12                           | 1         |
| <b>ActiGraph GT9X (Waist)</b> | 5.7 ± 18.5<br>(0 – 138)     | 77.6 ± 86.6<br>(0 – 505)    | 233.1 ± 105.2<br>(3 – 425)  | 438.1 ± 74.8<br>(120 – 538) | 523.0 ± 49.6<br>(255 – 595) | 575.0 ± 38.5<br>(408 – 658) | 608.3 ± 39.0<br>(473 – 685) | 629.4 ± 113.1<br>(0 – 815)  | 694.2 ± 64.7<br>(520 – 758)  | 727.5     |
| <i>n</i>                      | 79                          | 78                          | 78                          | 77                          | 77                          | 77                          | 72                          | 46                          | 12                           | 1         |
| <b>ActiGraph GT9X (Wrist)</b> | 39.5 ± 55.3<br>(0 – 300)    | 88.0 ± 75.7<br>(0 – 343)    | 103.3 ± 85.1<br>(0 – 353)   | 155.4 ± 98.5<br>(0 – 413)   | 230.8 ± 82.8<br>(5 – 400)   | 273.7 ± 73.6<br>(23 – 455)  | 309.8 ± 64.0<br>(68 – 498)  | 329.0 ± 63.9<br>(30 – 475)  | 346.7 ± 42.5<br>(245 – 395)  | 397.5     |
| <i>n</i>                      | 78                          | 77                          | 77                          | 76                          | 76                          | 76                          | 71                          | 46                          | 12                           | 1         |
| <b>activPAL</b>               | 163.0 ± 121.7<br>(0 – 565)  | 337.4 ± 85.8<br>(20 – 660)  | 422.5 ± 52<br>(325 – 665)   | 480.9 ± 41.8<br>(380 – 650) | 528.6 ± 35.1<br>(445 – 645) | 569.7 ± 35.3<br>(505 – 655) | 601.3 ± 34.3<br>(530 – 670) | 645.1 ± 43.9<br>(560 – 775) | 697.5 ± 37.1<br>(645 – 750)  | 780.0     |
| <i>n</i>                      | 76                          | 75                          | 75                          | 74                          | 74                          | 74                          | 69                          | 43                          | 12                           | 1         |
| <b>Apple Watch Serie 1</b>    | 54.3 ± 129.8<br>(0 – 580)   | 268.7 ± 144.1<br>(0 – 666)  | 420.8 ± 71.0<br>(115 – 701) | 473.7 ± 44.0<br>(378 – 648) | 519.4 ± 39.8<br>(399 – 640) | 562.5 ± 42.1<br>(449 – 681) | 598.3 ± 39.5<br>(528 – 740) | 631.6 ± 47.5<br>(495 – 739) | 704.3 ± 66.9<br>(624 – 850)  | 662.0     |
| <i>n</i>                      | 80                          | 79                          | 79                          | 77                          | 78                          | 78                          | 73                          | 46                          | 12                           | 1         |
| <b>Digiwalker SW-200</b>      | 30.0 ± 67.9<br>(0 – 354)    | 129.4 ± 140.1<br>(0 – 659)  | 279.1 ± 140.3<br>(2 – 703)  | 404.1 ± 103.0<br>(82 – 644) | 498.9 ± 66.3<br>(256 – 642) | 558.4 ± 41.8<br>(422 – 653) | 598.9 ± 38.8<br>(500 – 696) | 644.0 ± 43.3<br>(564 – 734) | 701.9 ± 47.4<br>(640 – 771)  | 801.0     |
| <i>n</i>                      | 80                          | 79                          | 79                          | 78                          | 78                          | 78                          | 73                          | 46                          | 12                           | 1         |
| <b>Fitbit One</b>             | 9.2 ± 42.3<br>(0 – 344)     | 213.4 ± 151.0<br>(0 – 666)  | 412.2 ± 48.9<br>(317 – 665) | 476.7 ± 39.8<br>(382 – 651) | 524.8 ± 34.7<br>(442 – 647) | 565.6 ± 33.9<br>(498 – 652) | 598.2 ± 34.1<br>(528 – 675) | 642.8 ± 43.7<br>(562 – 740) | 693.3 ± 47.3<br>(641 – 764)  | 786.0     |
| <i>n</i>                      | 77                          | 76                          | 75                          | 74                          | 75                          | 75                          | 69                          | 44                          | 12                           | 1         |
| <b>Garmin vivoactive HR</b>   | 35.1 ± 102.6<br>(0 – 502)   | 308.5 ± 146.2<br>(0 – 665)  | 402.8 ± 70.0<br>(47 – 627)  | 471.0 ± 38.3<br>(379 – 619) | 518.5 ± 31.0<br>(437 – 595) | 546.5 ± 45.6<br>(322 – 603) | 556.8 ± 78.0<br>(329 – 897) | 527.2 ± 90.1<br>(326 – 727) | 510.4 ± 105.9<br>(369 – 663) | 492.0     |

|                          |                             |                             |                             |                             |                             |                             |                             |                              |                              |       |
|--------------------------|-----------------------------|-----------------------------|-----------------------------|-----------------------------|-----------------------------|-----------------------------|-----------------------------|------------------------------|------------------------------|-------|
| <i>n</i>                 | 77                          | 76                          | 76                          | 75                          | 75                          | 72                          | 70                          | 45                           | 12                           | 1     |
| <b>Garmin vivofit 3</b>  | 60.3 ± 123.0<br>(0 – 567)   | 337.1 ± 117.9<br>(21 – 665) | 465.6 ± 95.2<br>(329 – 727) | 477.9 ± 40.4<br>(413 – 651) | 521.9 ± 34.7<br>(435 – 643) | 566.8 ± 40.3<br>(497 – 757) | 599.3 ± 42.7<br>(527 – 819) | 637.9 ± 42.3<br>(563 – 725)  | 696.6 ± 52.3<br>(631 – 795)  | 781.0 |
| <i>n</i>                 | 72                          | 71                          | 71                          | 70                          | 70                          | 70                          | 66                          | 44                           | 11                           | 1     |
| <b>GENEActiv (Waist)</b> | 234.7 ± 111.9<br>(40 – 615) | 369.2 ± 86.9<br>(150 – 663) | 423.1 ± 53.0<br>(343 – 660) | 479.4 ± 41.7<br>(385 – 645) | 526.8 ± 35.9<br>(445 – 645) | 568.1 ± 35.4<br>(503 – 658) | 600.8 ± 35.0<br>(530 – 673) | 634.1 ± 109.0<br>(0 – 798)   | 704.8 ± 44.4<br>(650 – 780)  | 780.0 |
| <i>n</i>                 | 68                          | 67                          | 67                          | 66                          | 66                          | 66                          | 63                          | 41                           | 12                           | 1     |
| <b>GENEActiv (Wrist)</b> | 208.7 ± 123.6<br>(3 – 603)  | 399.2 ± 79.6<br>(208 – 670) | 427.8 ± 56.7<br>(338 – 690) | 471.5 ± 44.6<br>(333 – 625) | 504.1 ± 48.9<br>(330 – 620) | 522.4 ± 72.9<br>(295 – 628) | 535.4 ± 85.5<br>(318 – 655) | 564.5 ± 104.3<br>(318 – 720) | 540.0 ± 120.5<br>(370 – 700) | 425.0 |
| <i>n</i>                 | 80                          | 79                          | 79                          | 78                          | 78                          | 78                          | 73                          | 45                           | 12                           | 1     |
| <b>NL-1000</b>           | 16.8 ± 56.4<br>(0 – 351)    | 93.9 ± 122.1<br>(0 – 679)   | 333.9 ± 124.7<br>(35 – 664) | 451.2 ± 57.2<br>(312 – 653) | 519.4 ± 58.4<br>(116 – 645) | 572.1 ± 56.6<br>(499 – 967) | 598.3 ± 37.0<br>(511 – 676) | 644.5 ± 43.8<br>(565 – 741)  | 698.3 ± 43.0<br>(643 – 765)  | 793.0 |
| <i>n</i>                 | 80                          | 79                          | 79                          | 77                          | 77                          | 78                          | 73                          | 47                           | 12                           | 1     |
| <b>Samsung Gear Fit2</b> | 18.4 ± 75.9<br>(0 – 485)    | 106.1 ± 147.7<br>(0 – 631)  | 407.2 ± 119.4<br>(31 – 717) | 467.1 ± 67.6<br>(1 – 638)   | 514.4 ± 36.7<br>(398 – 621) | 557.7 ± 37.9<br>(467 – 664) | 590.3 ± 33.8<br>(494 – 660) | 627 ± 38.8<br>(557 – 711)    | 610.1 ± 69.0<br>(474 – 683)  | 620.0 |
| <i>n</i>                 | 79                          | 78                          | 78                          | 77                          | 77                          | 77                          | 72                          | 46                           | 12                           | 1     |
| <b>StepWatch</b>         | 242.8 ± 107.2<br>(45 – 620) | 377.7 ± 66.8<br>(200 – 670) | 425.7 ± 51.7<br>(365 – 690) | 481.6 ± 40.1<br>(395 – 645) | 528.6 ± 34.7<br>(450 – 645) | 569.9 ± 35.0<br>(500 – 660) | 602.2 ± 34.9<br>(530 – 675) | 639.2 ± 40.2<br>(530 – 705)  | 629.6 ± 63.6<br>(530 – 705)  | 535.0 |

Values represent the average number of steps ± standard deviation (minimum – maximum). See **Additional file 2** for a graphical classification of wearable technologies by age groups.

**Additional File 3: Suppl Table 4** Sample sizes (*n*) and number of steps derived from direct observation and each wearable technology at each treadmill speed for Older Adults (61–85 years)

|                               | Treadmill speed, km/h (mph) |                             |                             |                             |                             |                             |                             |                              |                              |
|-------------------------------|-----------------------------|-----------------------------|-----------------------------|-----------------------------|-----------------------------|-----------------------------|-----------------------------|------------------------------|------------------------------|
|                               | Slow                        |                             |                             |                             | Normal                      |                             |                             | Fast                         |                              |
|                               | 0.8 (0.5)                   | 1.6 (1.0)                   | 2.4 (1.5)                   | 3.2 (2.0)                   | 4.0 (2.5)                   | 4.8 (3.0)                   | 5.6 (3.5)                   | 6.4 (4.0)                    | 7.2 (4.5)                    |
| <i>n</i>                      | 98                          | 89                          | 86                          | 81                          | 75                          | 67                          | 48                          | 17                           | 3                            |
| <b>Direct observation</b>     | 346.4 ± 93.9<br>(190 – 657) | 403.1 ± 70.0<br>(253 – 601) | 453.0 ± 54.2<br>(332 – 626) | 493.1 ± 42.1<br>(407 – 649) | 531.3 ± 35.1<br>(467 – 640) | 570.7 ± 32.7<br>(503 – 659) | 606.2 ± 39.4<br>(531 – 718) | 647.1 ± 41.7<br>(563 – 742)  | 684.7 ± 39.6<br>(644 – 723)  |
| <i>n</i>                      | 94                          | 86                          | 83                          | 78                          | 73                          | 66                          | 48                          | 17                           | 3                            |
| <b>Actical</b>                | 0.4 ± 2.2<br>(0 – 15)       | 9.8 ± 24.6<br>(0 – 155)     | 129.2 ± 116.3<br>(0 – 498)  | 381.3 ± 138.4<br>(0 – 620)  | 516.4 ± 113.9<br>(0 – 660)  | 553.0 ± 127.8<br>(0 – 675)  | 581.9 ± 156.0<br>(0 – 738)  | 627.9 ± 167.4<br>(0 – 765)   | 716.7 ± 51.4<br>(668 – 770)  |
| <i>n</i>                      | 96                          | 87                          | 84                          | 79                          | 74                          | 66                          | 47                          | 17                           | 3                            |
| <b>ActiGraph GT9X (Waist)</b> | 12.8 ± 42.8<br>(0 – 283)    | 53.8 ± 70.0<br>(0 – 375)    | 170.4 ± 92.7<br>(8 – 448)   | 378.2 ± 94.0<br>(30 – 525)  | 516.3 ± 44.9<br>(338 – 603) | 571.1 ± 56.2<br>(248 – 675) | 608.1 ± 55.6<br>(368 – 713) | 642.4 ± 66.8<br>(448 – 750)  | 479.2 ± 177.5<br>(315 – 668) |
| <i>n</i>                      | 96                          | 87                          | 84                          | 79                          | 74                          | 66                          | 48                          | 17                           | 3                            |
| <b>ActiGraph GT9X (Wrist)</b> | 64.2 ± 71.3<br>(0 – 315)    | 100.9 ± 70.7<br>(3 – 270)   | 136.7 ± 88.1<br>(5 – 413)   | 187.4 ± 98.3<br>(5 – 495)   | 243.0 ± 93.1<br>(28 – 563)  | 291.3 ± 90.8<br>(58 – 608)  | 325.6 ± 89.9<br>(165 – 738) | 348.5 ± 70.2<br>(188 – 518)  | 371.7 ± 75.6<br>(315 – 458)  |
| <i>n</i>                      | 95                          | 86                          | 83                          | 78                          | 74                          | 67                          | 48                          | 17                           | 3                            |
| <b>activPAL</b>               | 225.2 ± 133.1<br>(0 – 620)  | 388.0 ± 81.2<br>(220 – 575) | 453.0 ± 52.8<br>(335 – 605) | 492.9 ± 42.4<br>(395 – 650) | 533.0 ± 34.6<br>(465 – 650) | 574.3 ± 33.5<br>(510 – 665) | 611.6 ± 38.7<br>(535 – 725) | 654.1 ± 41.3<br>(575 – 745)  | 703.3 ± 53.0<br>(655 – 760)  |
| <i>n</i>                      | 98                          | 89                          | 86                          | 81                          | 75                          | 66                          | 48                          | 17                           | 3                            |
| <b>Apple Watch Serie 1</b>    | 150.7 ± 164.7<br>(0 – 641)  | 309.8 ± 120.2<br>(0 – 586)  | 425.9 ± 77.9<br>(118 – 564) | 478.0 ± 69.6<br>(98 – 728)  | 528.6 ± 81.4<br>(418 – 981) | 568.9 ± 43.2<br>(490 – 677) | 572.2 ± 77.7<br>(217 – 723) | 627.9 ± 103.1<br>(272 – 751) | 670.0 ± 31.8<br>(635 – 697)  |
| <i>n</i>                      | 98                          | 89                          | 86                          | 81                          | 75                          | 64                          | 48                          | 17                           | 3                            |
| <b>Digiwalker SW-200</b>      | 20.5 ± 47.1<br>(0 – 238)    | 69.3 ± 95.6<br>(0 – 432)    | 173.6 ± 141.0<br>(0 – 518)  | 255.9 ± 152.7<br>(0 – 574)  | 342.7 ± 144.0<br>(23 – 576) | 449.6 ± 126.9<br>(57 – 624) | 522.6 ± 96.0<br>(302 – 662) | 599.5 ± 72.2<br>(427 – 723)  | 660.7 ± 13.7<br>(646 – 673)  |
| <i>n</i>                      | 98                          | 89                          | 86                          | 81                          | 75                          | 66                          | 48                          | 17                           | 3                            |
| <b>Fitbit Ionic</b>           | 48.3 ± 118.4<br>(0 – 526)   | 185.9 ± 160.9<br>(0 – 534)  | 404.1 ± 90.2<br>(22 – 581)  | 477.4 ± 49.6<br>(385 – 640) | 517.6 ± 40.3<br>(384 – 634) | 550.2 ± 42.8<br>(420 – 659) | 576.0 ± 52.1<br>(442 – 705) | 629.7 ± 53.1<br>(534 – 749)  | 631.0 ± 44.6<br>(580 – 663)  |
| <i>n</i>                      | 98                          | 89                          | 86                          | 81                          | 75                          | 66                          | 48                          | 17                           | 3                            |
| <b>Fitbit Zip</b>             | 3.8 ± 27.5<br>(0 – 267)     | 35.4 ± 75.6<br>(0 – 383)    | 385.7 ± 124.6<br>(0 – 563)  | 480.1 ± 63.4<br>(29 – 608)  | 533.1 ± 62.3<br>(467 – 979) | 566.1 ± 31.9<br>(503 – 652) | 603.6 ± 38.6<br>(526 – 712) | 644.8 ± 41.3<br>(563 – 738)  | 681.0 ± 39.2<br>(640 – 718)  |



|                              |                             |                             |                             |                             |                             |                             |                             |                               |                             |
|------------------------------|-----------------------------|-----------------------------|-----------------------------|-----------------------------|-----------------------------|-----------------------------|-----------------------------|-------------------------------|-----------------------------|
| <i>n</i>                     | 96                          | 89                          | 86                          | 80                          | 73                          | 66                          | 48                          | 17                            | 3                           |
| <b>Garmin vivoactive 3</b>   | 47.7 ± 114.6<br>(0 – 553)   | 271.0 ± 156.7<br>(0 – 550)  | 430.6 ± 64.8<br>(236 – 636) | 482.1 ± 37.2<br>(398 – 573) | 515.2 ± 54.4<br>(154 – 615) | 564.0 ± 33.0<br>(495 – 655) | 597.2 ± 34.4<br>(527 – 707) | 637.4 ± 38.7<br>(558 – 707)   | 671.3 ± 31.9<br>(637 – 700) |
| <i>n</i>                     | 74                          | 66                          | 65                          | 62                          | 61                          | 55                          | 42                          | 16                            | 3                           |
| <b>GENEActiv (Waist)</b>     | 228.0 ± 118.3<br>(30 – 625) | 394.2 ± 63.1<br>(243 – 575) | 450.1 ± 50.2<br>(333 – 580) | 489.3 ± 39.4<br>(400 – 610) | 532.6 ± 35.1<br>(468 – 650) | 571.5 ± 32.6<br>(510 – 665) | 613.3 ± 40.9<br>(533 – 725) | 654.4 ± 43.5<br>(570 – 750)   | 703.3 ± 47.6<br>(658 – 753) |
| <i>n</i>                     | 73                          | 66                          | 64                          | 61                          | 60                          | 54                          | 42                          | 16                            | 3                           |
| <b>GENEActiv (Wrist)</b>     | 213.3 ± 112.1<br>(8 – 623)  | 389.6 ± 62.7<br>(223 – 563) | 439.1 ± 44.8<br>(348 – 573) | 482.5 ± 41.8<br>(355 – 598) | 520.2 ± 41.5<br>(378 – 625) | 554.2 ± 61.9<br>(308 – 665) | 596.4 ± 67.8<br>(350 – 723) | 629.8 ± 86.2<br>(345 – 740)   | 699.2 ± 51.4<br>(650 – 753) |
| <i>n</i>                     | 98                          | 89                          | 86                          | 81                          | 75                          | 66                          | 48                          | 17                            | 3                           |
| <b>NL-1000</b>               | 11.2 ± 30.1<br>(0 – 214)    | 99.9 ± 102.4<br>(0 – 440)   | 332.7 ± 123.9<br>(3 – 620)  | 450.2 ± 78.1<br>(74 – 596)  | 518.0 ± 58.9<br>(112 – 632) | 551.3 ± 86.2<br>(90 – 652)  | 583.1 ± 104.9<br>(62 – 715) | 641.6 ± 39.7<br>(562 – 732)   | 675.7 ± 33.7<br>(640 – 707) |
| <i>n</i>                     | 98                          | 89                          | 85                          | 81                          | 75                          | 66                          | 48                          | 17                            | 3                           |
| <b>PiezoRx</b>               | 85.7 ± 132.0<br>(0 – 553)   | 342.0 ± 126.9<br>(0 – 568)  | 448.2 ± 54.5<br>(217 – 578) | 489.3 ± 37.6<br>(406 – 610) | 530.8 ± 34.5<br>(465 – 639) | 570.0 ± 33.4<br>(502 – 657) | 594.2 ± 82.1<br>(105 – 717) | 672.5 ± 130.1<br>(566 – 1159) | 680.7 ± 36.7<br>(642 – 715) |
| <i>n</i>                     | 97                          | 87                          | 85                          | 80                          | 74                          | 65                          | 47                          | 17                            | 3                           |
| <b>Polar M600</b>            | 62.3 ± 123.6<br>(0 – 512)   | 174.0 ± 160.2<br>(4 – 564)  | 347.3 ± 134.7<br>(34 – 578) | 463.4 ± 86.0<br>(20 – 617)  | 510.8 ± 65.6<br>(292 – 803) | 552.4 ± 82.5<br>(24 – 708)  | 585.6 ± 63.8<br>(456 – 844) | 626.2 ± 47.4<br>(548 – 731)   | 666.7 ± 36.1<br>(635 – 706) |
| <i>n</i>                     | 98                          | 89                          | 86                          | 81                          | 74                          | 66                          | 48                          | 17                            | 3                           |
| <b>Samsung Gear Fit2 Pro</b> | 33.9 ± 103.1<br>(0 – 589)   | 143.1 ± 157.7<br>(0 – 529)  | 386.4 ± 136.0<br>(0 – 679)  | 468.9 ± 38.9<br>(394 – 577) | 508.8 ± 40.3<br>(439 – 613) | 552.6 ± 41.9<br>(356 – 658) | 584.9 ± 34.9<br>(485 – 685) | 609.2 ± 27.5<br>(559 – 662)   | 637.0 ± 12.5<br>(625 – 650) |
| <i>n</i>                     | 95                          | 86                          | 83                          | 78                          | 72                          | 64                          | 45                          | 16                            | 3                           |
| <b>StepWatch</b>             | 339.7 ± 106.6<br>(70 – 625) | 414.4 ± 67.6<br>(245 – 592) | 456.1 ± 53.1<br>(355 – 622) | 493.4 ± 41.2<br>(410 – 648) | 532.4 ± 35.1<br>(468 – 650) | 571.4 ± 34.0<br>(505 – 665) | 608.0 ± 32.7<br>(535 – 700) | 635.3 ± 42.9<br>(520 – 685)   | 633.3 ± 84.6<br>(540 – 705) |

Values represent the average number of steps ± standard deviation (minimum – maximum). See **Additional file 2** for a graphical classification of wearable technologies by age groups.
