# Supplementary material for: A catalog of validity indices for step counting wearable technologies during treadmill walking: the CADENCE-adults study
Source: PubMed Central journal article supplement (PMC9461139; doi:10.1186/s12966-022-01350-9), 2022-09-08
Supplement: 12966_2022_1350_MOESM7_ESM.pdf [file 12966_2022_1350_MOESM7_ESM.pdf]

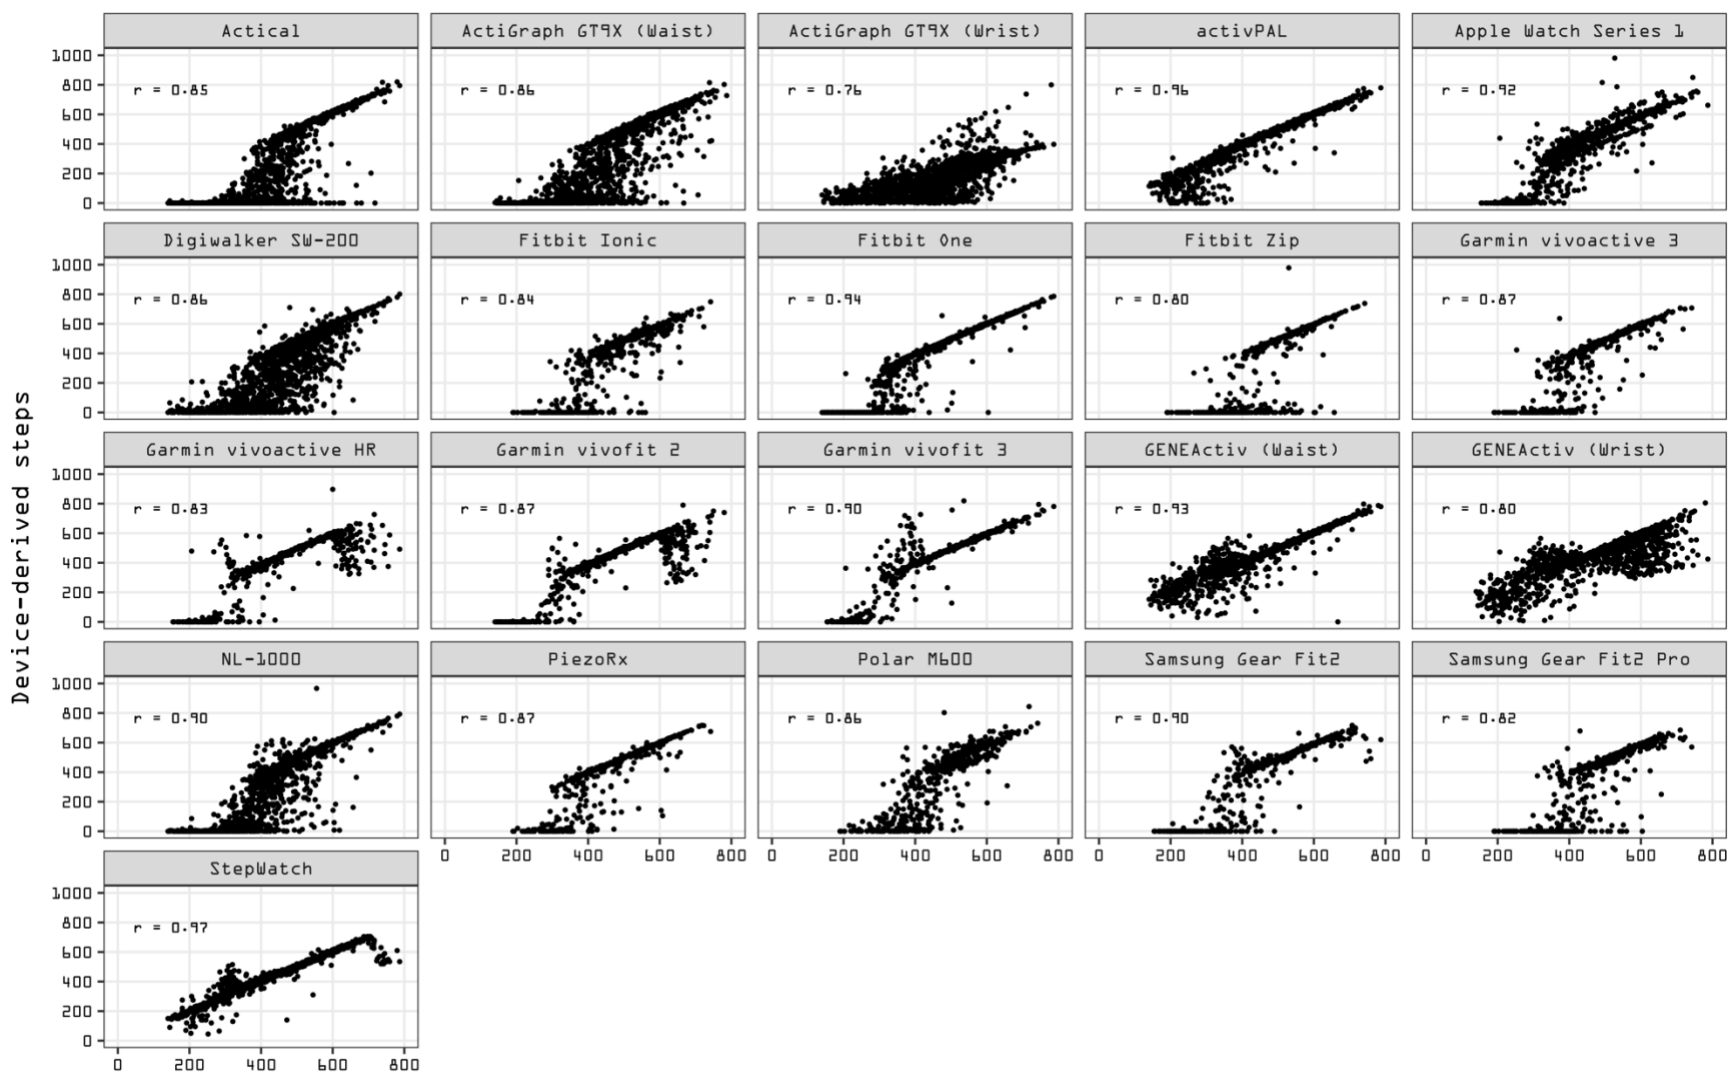

1 Directly-observed steps (Criterion)

2 **Additional file 7: Suppl Fig 1** Representation of the correlation between directly observed steps and steps derived from wearable

3 technologies across all walking bouts. The X-Y scatterplot is representative of how tightly the wearable technology step counts hold to

4 a linear relationship to directly observed steps across all walking bouts. X axis represents directly observed steps, and Y axis represents  
5 steps derived from wearable technology. Correlation coefficients ( $r$ ) closer to 1.0 indicate tighter relationship (more precise) to directly-  
6 observed steps.
