# Supplementary material for: A catalog of validity indices for step counting wearable technologies during treadmill walking: the CADENCE-adults study
Source: PubMed Central journal article supplement (PMC9461139; doi:10.1186/s12966-022-01350-9), 2022-09-08
Supplement: 12966_2022_1350_MOESM8_ESM.pdf [file 12966_2022_1350_MOESM8_ESM.pdf]

1 **Additional File 8: Suppl Table 1** Validity indices (accuracy, bias, and precision) averaged across wear location for each speed bout

|                  | Treadmill speed, km/h (mph) |              |              |              |              |              |              |              |              |              |
|------------------|-----------------------------|--------------|--------------|--------------|--------------|--------------|--------------|--------------|--------------|--------------|
|                  | Slow                        |              |              |              | Normal       |              |              |              | Fast         |              |
|                  | 0.8 (0.5)                   | 1.6 (1.0)    | 2.4 (1.5)    | 3.2 (2.0)    | 4.0 (2.5)    | 4.8 (3.0)    | 5.6 (3.5)    | 6.4 (4.0)    | 7.2 (4.5)    | 8.0 (5.0)    |
| <i>Ankle</i>     |                             |              |              |              |              |              |              |              |              |              |
| <b>MAPE ± SD</b> | 9.3 ± 14.5                  | 8.4 ± 12.8   | 1.6 ± 2.2    | 0.9 ± 0.9    | 0.8 ± 0.7    | 1.0 ± 3.1    | 0.8 ± 1.1    | 1.5 ± 3.9    | 8.1 ± 11.1   | 17.8 ± 16.3  |
| <b>MPE ± SD</b>  | -4.7 ± 16.6                 | 7.2 ± 13.6   | 0.5 ± 2.7    | 0.1 ± 1.3    | 0.2 ± 1.0    | 0.0 ± 3.2    | 0.3 ± 1.3    | -0.4 ± 4.2   | -7.1 ± 11.8  | -17.8 ± 16.3 |
| <i>Thigh</i>     |                             |              |              |              |              |              |              |              |              |              |
| <b>MAPE ± SD</b> | 37.9 ± 29.8                 | 5.8 ± 9.6    | 1.3 ± 1.3    | 1.0 ± 1.0    | 0.8 ± 0.8    | 1.0 ± 3.4    | 0.8 ± 0.8    | 0.9 ± 1.0    | 1.2 ± 1.3    | 1.4 ± 1.6    |
| <b>MPE ± SD</b>  | -37.7 ± 30.0                | -4.1 ± 10.4  | -0.1 ± 1.8   | -0.1 ± 1.4   | 0.2 ± 1.1    | 0.1 ± 3.6    | 0.4 ± 1.0    | 0.3 ± 1.3    | 0.0 ± 1.8    | -1.4 ± 1.6   |
| <i>Waist</i>     |                             |              |              |              |              |              |              |              |              |              |
| <b>MAPE ± SD</b> | 86.3 ± 27.8                 | 64.7 ± 36.4  | 30.8 ± 31.5  | 10.5 ± 18.8  | 4.5 ± 12.7   | 3.1 ± 10.3   | 2.4 ± 8.5    | 2.3 ± 9.3    | 2.3 ± 6.2    | 3.5 ± 8.7    |
| <b>MPE ± SD</b>  | -83.9 ± 34.4                | -61.3 ± 41.9 | -29.2 ± 33.0 | -9.7 ± 19.2  | -3.1 ± 13.1  | -1.6 ± 10.6  | -0.8 ± 8.8   | -0.5 ± 9.5   | -0.4 ± 6.6   | -2.4 ± 9.0   |
| <i>Wrist</i>     |                             |              |              |              |              |              |              |              |              |              |
| <b>MAPE ± SD</b> | 77.7 ± 30.8                 | 45.1 ± 35.0  | 22.6 ± 30.0  | 15.7 ± 26.4  | 13.8 ± 22.6  | 13.4 ± 20.9  | 14.6 ± 20.1  | 18.2 ± 20.8  | 22.0 ± 20.6  | 27.0 ± 18.1  |
| <b>MPE ± SD</b>  | -75.5 ± 35.9                | -36.5 ± 43.8 | -18.0 ± 33.0 | -14.8 ± 26.9 | -13.0 ± 23.1 | -12.7 ± 21.4 | -14.0 ± 20.6 | -18.0 ± 21.0 | -21.3 ± 21.3 | -27.0 ± 18.1 |

2 All mean absolute percentage error (MAPE) and mean percentage error (MPE) values are presented as mean percentage ± standard  
3 deviation (SD). MAPE and SD values closer to 0% indicate higher accuracy and precision, respectively. MPE values closer to 0%  
4 indicate lower bias. Ankle-worn wearable: StepWatch. Thigh-worn wearable: activPAL. Waist-worn wearables: Actical, ActiGraph  
5 GT9X, Digi-Walker SW-200, Fitbit One, Fitbit Zip, GENEActiv, NL-1000, PiezoRx. Wrist-worn wearables: ActiGraph GT9X, Apple  
6 Watch Serie 1, Fitbit Ionic, Garmin vivoactive 3, Garmin vivoactive HR, Garmin vivofit 2, Garmin vivofit 3, GENEActiv, Polar M600,  
7 Samsung Gear Fit2, Samsung Gear Fit2 Pro. **See Additional file 2** for a graphical classification of wearable technologies by age groups.

8 **Additional File 8: Suppl Table 2** Validity indices (accuracy, bias, and precision) averaged across all wearable technologies and  
 9 presented by age group

|                                           | Treadmill speed, km/h (mph) |              |              |              |             |             |             |             |             |              |
|-------------------------------------------|-----------------------------|--------------|--------------|--------------|-------------|-------------|-------------|-------------|-------------|--------------|
|                                           | Slow                        |              |              |              | Normal      |             |             |             | Fast        |              |
|                                           | 0.8 (0.5)                   | 1.6 (1.0)    | 2.4 (1.5)    | 3.2 (2.0)    | 4.0 (2.5)   | 4.8 (3.0)   | 5.6 (3.5)   | 6.4 (4.0)   | 7.2 (4.5)   | 8.0 (5.0)    |
| <b>Young Adults</b><br>(21–40 years)      |                             |              |              |              |             |             |             |             |             |              |
| <b>MAPE ± SD</b>                          | 68.8 ± 38.4                 | 47.2 ± 36.1  | 22.7 ± 28.6  | 10.4 ± 21.0  | 7.5 ± 17.4  | 7.4 ± 17.0  | 7.9 ± 16.4  | 8.7 ± 17.0  | 9.4 ± 16.4  | 10.7 ± 16.1  |
| <b>MPE ± SD</b>                           | -63.1 ± 47.2                | -37.4 ± 46.2 | -20.1 ± 30.5 | -9.6 ± 21.4  | -6.6 ± 17.8 | -6.6 ± 17.3 | -7.0 ± 16.8 | -7.9 ± 17.4 | -8.2 ± 17.0 | -10.2 ± 16.5 |
| <b>Middle-Age Adults</b><br>(41–60 years) |                             |              |              |              |             |             |             |             |             |              |
| <b>MAPE ± SD</b>                          | 75.0 ± 35.5                 | 46.4 ± 38.5  | 21.6 ± 29.2  | 9.5 ± 20.1   | 6.2 ± 15.6  | 5.8 ± 14.5  | 5.8 ± 13.8  | 7.5 ± 15.8  | 10.0 ± 16.3 | 15.4 ± 18.5  |
| <b>MPE ± SD</b>                           | -73.1 ± 39.1                | -37.9 ± 46.9 | -17.1 ± 32.1 | -8.6 ± 20.5  | -5.4 ± 15.9 | -4.6 ± 14.9 | -4.6 ± 14.3 | -6.3 ± 16.2 | -8.6 ± 17.1 | -14.9 ± 18.9 |
| <b>Older Adults</b><br>(61–85 years)      |                             |              |              |              |             |             |             |             |             |              |
| <b>MAPE ± SD</b>                          | 75.9 ± 34.3                 | 51.4 ± 39.9  | 25.2 ± 31.6  | 12.9 ± 22.5  | 8.7 ± 18.4  | 7.1 ± 15.8  | 7.0 ± 15.0  | 6.4 ± 14.4  | 7.9 ± 14.1  | NA           |
| <b>MPE ± SD</b>                           | -75.1 ± 36.0                | -49.3 ± 42.5 | -23.7 ± 32.8 | -12.0 ± 23.0 | -7.2 ± 19.1 | -5.8 ± 16.3 | -5.6 ± 15.5 | -4.6 ± 15.1 | -6.0 ± 15.0 | NA           |

10 All mean absolute percentage error (MAPE) and mean percentage error (MPE) values are presented as mean percentage ± standard  
 11 deviation (SD). MAPE and SD values closer to 0% indicate higher accuracy and precision, respectively. MPE values closer to 0%  
 12 indicate lower bias. All age groups (21-85 years) wore the Actical, ActiGraph GT9X (Waist), ActiGraph GT9X (Wrist), activPAL, Digi-  
 13 Walker SW-200, GENEActiv (Waist), GENEActiv (Wrist), NL-1000, and the StepWatch. Young Adults (21-40 years) also wore the  
 14 Fitbit One and Garmin vivofit 2. Middle-Age Adults (41-60 years) also wore the Apple Watch Serie 1, Fitbit One, Garmin vivoactive  
 15 HR, Garmin vivofit 3, and the Samsung Gear Fit2. Older Adults (61-85 years) also wore the AppleWatch Series 1, Fitbit Ionic, Fitbit

- 16 Zip, Garmin vivoactive 3, PiezoRx, Polar M600, and the Samsung Gear Fit2 Pro. See **Additional file 2** for a graphical classification of
- 17 wearable technologies by age groups.
