# Supplementary material for: A catalog of validity indices for step counting wearable technologies during treadmill walking: the CADENCE-adults study
Source: PubMed Central journal article supplement (PMC9461139; doi:10.1186/s12966-022-01350-9), 2022-09-08
Supplement: 12966_2022_1350_MOESM9_ESM.pdf [file 12966_2022_1350_MOESM9_ESM.pdf]

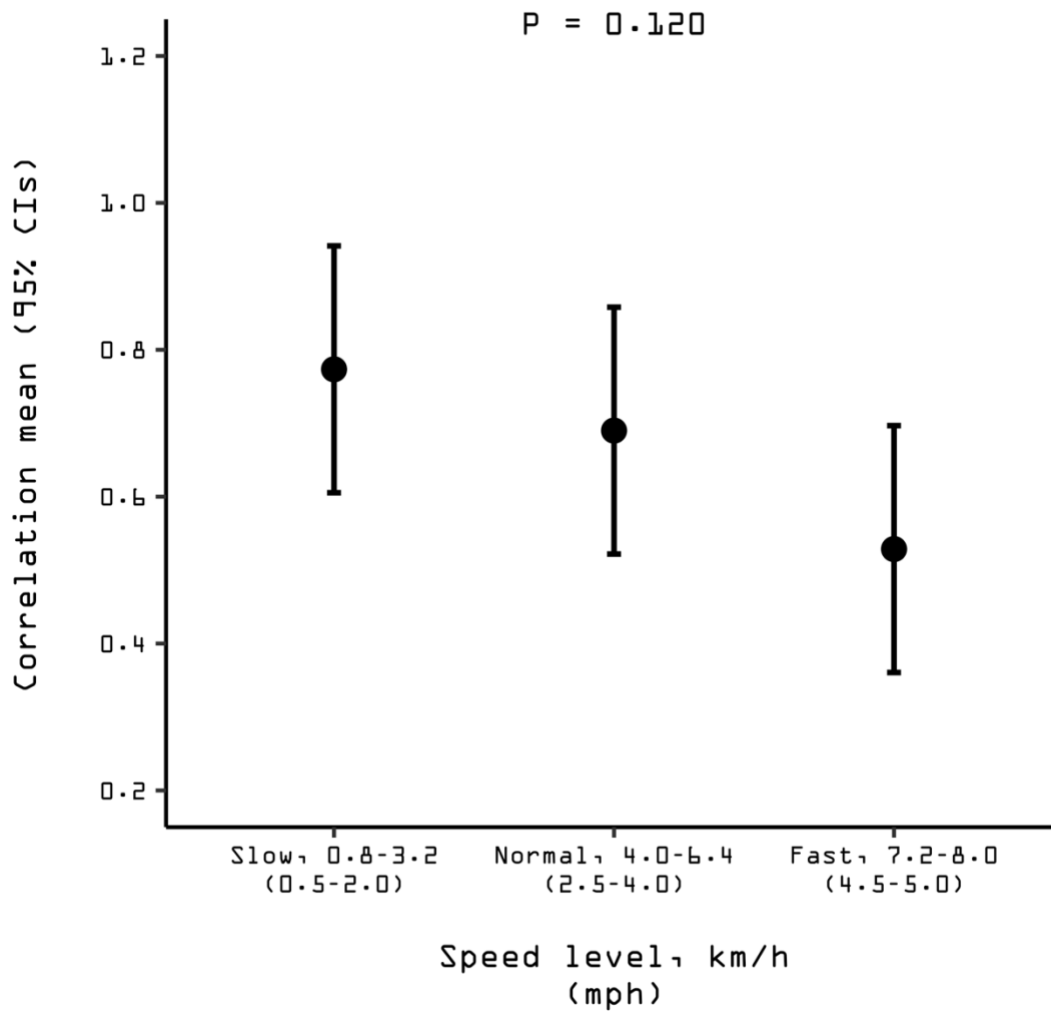

1

2 **Additional file 9: Suppl Fig 1** Effect of speed on overall precision of wearable technologies' step  
 3 counting ability. Each dot represents correlation coefficients averaged across wearable  
 4 technologies and each specific speed level (i.e., slow, normal or fast), with corresponding 95%  
 5 confidence intervals (CIs) extending above and below that point estimate. Correlation coefficients  
 6 closer to 1.0 indicate tighter relationship (more precise) to directly-observed steps, i.e., increased  
 7 precision. 95% CIs that do not overlap indicate significant differences.

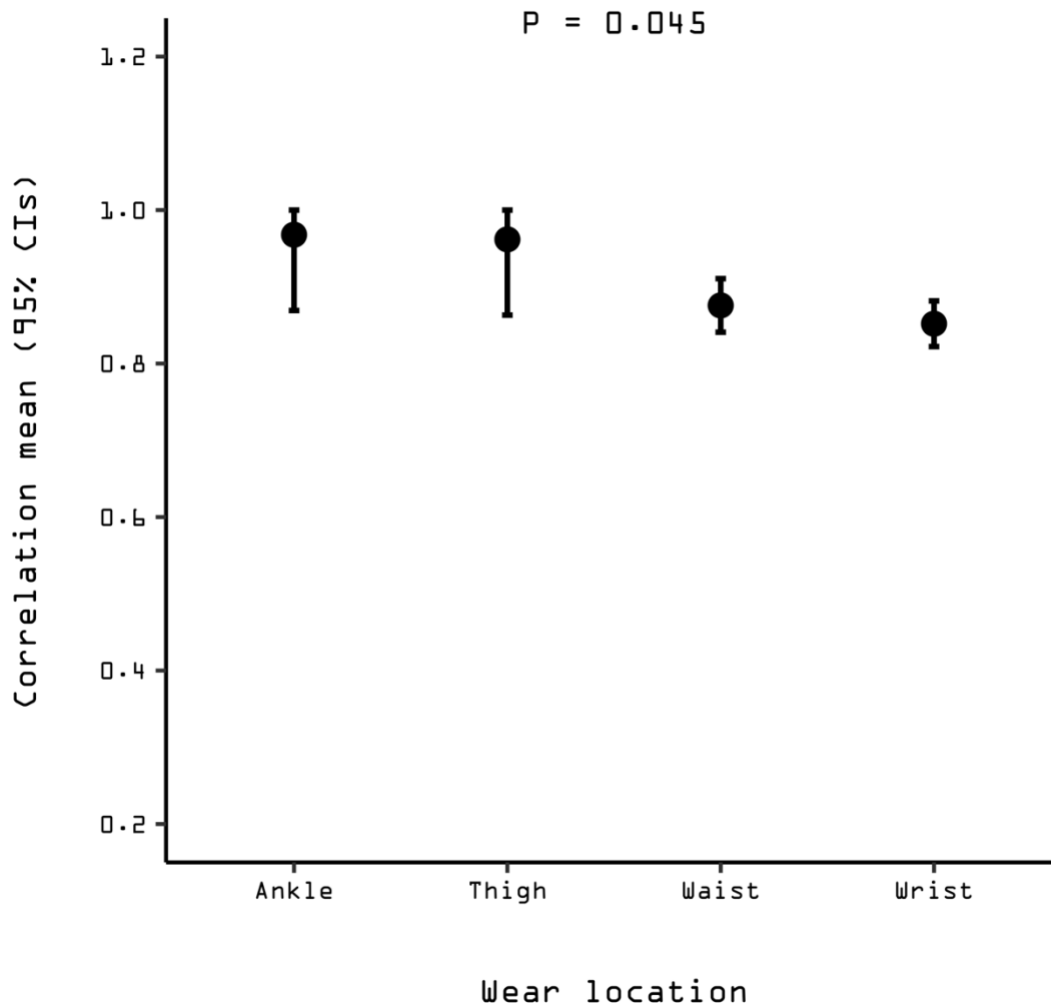

8

9 **Additional file 9: Suppl Fig 2** Effect of wear location on overall precision of wearable  
 10 technologies' step counting ability. Each dot represents correlation coefficients averaged across  
 11 wearable technologies and each specific wear location for all walking bouts, with corresponding  
 12 95% confidence intervals (CIs) extending above and below that point estimate. Correlation  
 13 coefficients closer to 1.0 indicate tighter relationship (more precise) to directly-observed steps,  
 14 i.e., increased precision. 95% CIs that do not overlap indicate significant differences.

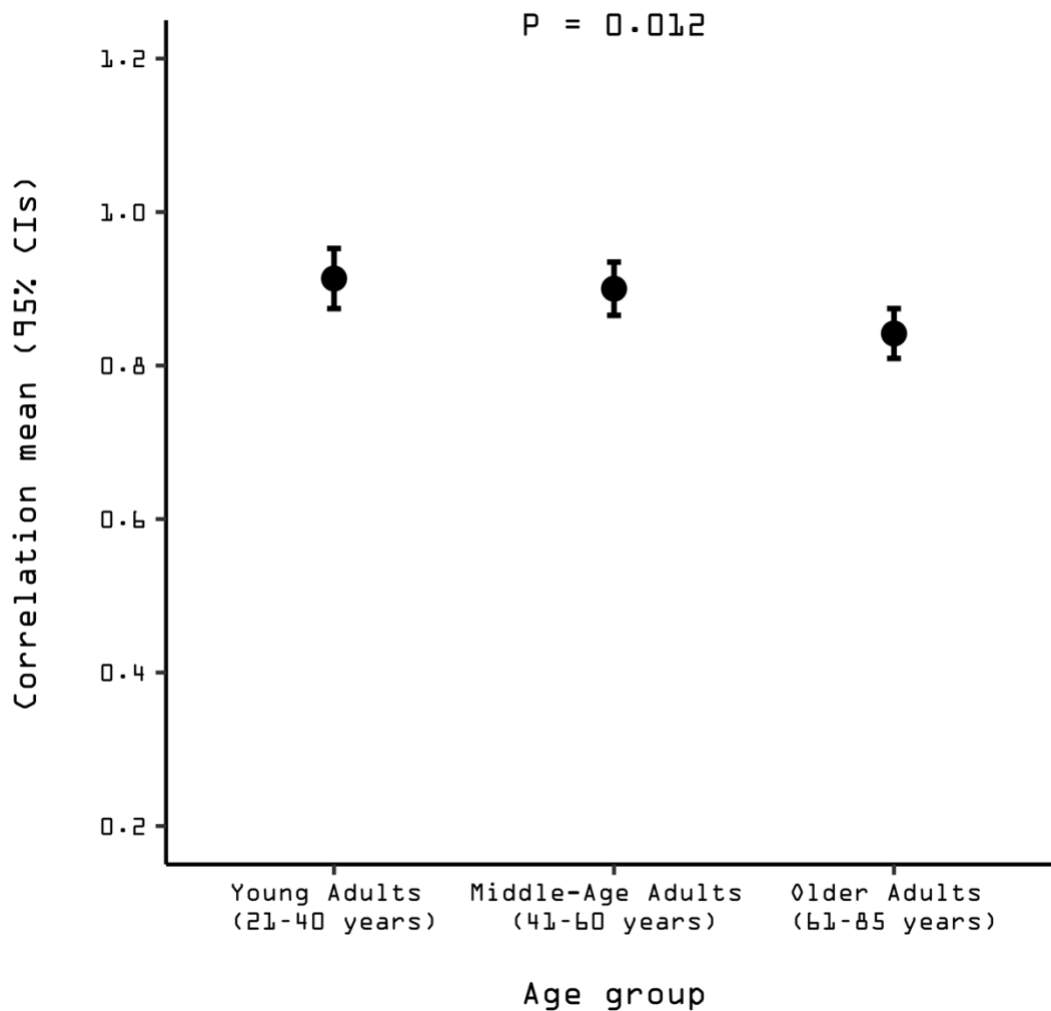

15

16 **Additional file 9: Suppl Fig 3** Effect of age on overall precision of wearable technologies' step  
 17 counting ability. Each dot represents correlation coefficients averaged across wearable  
 18 technologies and each specific age group for all walking bouts, with corresponding 95%  
 19 confidence intervals (CIs) extending above and below that point estimate. Correlation coefficients  
 20 closer to 1.0 indicate tighter relationship (more precise) to directly-observed steps, i.e., increased  
 21 precision. 95% CIs that do not overlap indicate significant differences.
